# Supplementary material for: Transcriptomic landscape of breast cancers through mRNA sequencing
Source: PubMed Central journal article supplement — Sci Rep. 2012 Feb 14;2:264. doi: 10.1038/srep00264 (PMC3278922; doi:10.1038/srep00264), 2012-02-14
Supplement: srep00264-s1.pdf [file srep00264-s1.pdf]

## **Transcriptomic landscape of breast cancers through mRNA sequencing**

Jeyanthi Eswaran<sup>1,2</sup>, Dinesh Cyanam<sup>1</sup>, Prakriti Mudvari<sup>1,2</sup>, Sirigiri Divijendra Natha Reddy<sup>2</sup>, Suresh B Pakala<sup>2</sup>, Sujit S Nair<sup>2</sup>, Liliana Florea<sup>5</sup> Suzanne A. W. Fuqua<sup>3</sup> Sucheta Godbole and Rakesh Kumar<sup>1,2,\*</sup>

<sup>1</sup>McCormick Genomic and Proteomics Center, <sup>2</sup>Department of Biochemistry and Molecular Biology, The George Washington University, Washington, DC 20037, USA <sup>4</sup>Breast Center, Baylor College of Medicine, One Baylor Plaza, 1220 Alkek, Houston, TX 77030, USA. <sup>5</sup>McKusick-Nathans Institute of Genetic Medicine, School of Medicine, Johns Hopkins University, Baltimore 21205

\*Correspondence: [bcmrxk@gwumc.edu](mailto:bcmrxk@gwumc.edu).

Supplement Table 1 : mRNA sequencing of all breast cancer samples and their alignment statistics overview against Ensembl GRCh37.62 B. reference using TopHat aligning program

| Group         | Sample | No. of Reads | No. of filtered Reads | Total aligned Reads | No. of unique aligned reads |
|---------------|--------|--------------|-----------------------|---------------------|-----------------------------|
| TNBC          | A1     | 60,710,416   | 60,685,374            | 44318616            | 9,042,922                   |
|               | A2     | 45604510     | 45,599,673            | 27176808            | 5,717,561                   |
|               | A3     | 70,754,133   | 70,722,004            | 49593712            | 10,632,860                  |
|               | A4     | 19,578,597   | 58,642,366            | 37267560            | 7,713,545                   |
|               | A5     | 54,369,476   | 54,358,396            | 33873616            | 7,232,310                   |
|               | A6     | 55834686     | 55,820,801            | 34714784            | 7,365,416                   |
| Non-TNBC      | B1     | 91,454,047   | 91,436,856            | 66784320            | 13,227,246                  |
|               | B2     | 67,655,694   | 67,636,543            | 47344552            | 8,062,318                   |
|               | B3     | 73,057,434   | 73,035,978            | 50850020            | 8,897,604                   |
|               | B4     | 88,014,336   | 87,997,294            | 64734596            | 12,727,038                  |
|               | B5     | 77,050,214   | 77,031,995            | 52807956            | 11,378,537                  |
|               | B6     | 67,991,540   | 67,982,906            | 49895320            | 8,957,757                   |
| HER2-Positive | C1     | 107,397,991  | 107,376,005           | 83112352            | 16,184,345                  |
|               | C2     | 76,188,935   | 76,173,402            | 58157296            | 10,183,562                  |
|               | C3     | 54,369,476   | 86,518,204            | 64519232            | 7,232,310                   |
|               | C4     | 90,948,038   | 90,930,481            | 67870968            | 12,765,356                  |
|               | C5     | 30,277,252   | 30,273,376            | 22253992            | 3,778,143                   |

Supplement Table 2: Alignment statistics summary of all 17 breast cancer sample mRNA paired - end reads aligning to human genome Ensembl GRCh37.62 B. using TopHat aligning program

| Group         | Sample | No. of Reads | Aligned reads  | Mate Missing   | Both Mate Flip | One Mate Flip |
|---------------|--------|--------------|----------------|----------------|----------------|---------------|
| TNBC          | A1     | 60,685,374   | 44318616 (73%) | 14616456 (24%) | 1089002 (2%)   | 661298 (1%)   |
|               | A2     | 45,599,673   | 27176808 (60%) | 16496051 (36%) | 914022 (2%)    | 1012792 (2%)  |
|               | A3     | 70,722,004   | 49593712 (70%) | 18853234 (27%) | 1518464 (2%)   | 756596 (1%)   |
|               | A4     | 58,642,366   | 37267560 (64%) | 19006216 (32%) | 1603415 (3%)   | 765174 (1%)   |
|               | A5     | 54,358,396   | 33873616 (62%) | 18457006 (34%) | 1118918 (2%)   | 908856 (2%)   |
|               | A6     | 55,820,801   | 34714784 (62%) | 18727324 (34%) | 1598970 (3%)   | 779772 (1%)   |
| Non-TNBC      | B1     | 91,436,856   | 66784320 (73%) | 21429496 (23%) | 2226656 (2%)   | 996382 (1%)   |
|               | B2     | 67,636,543   | 47344552 (70%) | 18059232 (27%) | 1572350 (2%)   | 660410 (1%)   |
|               | B3     | 73,035,978   | 50850020 (70%) | 19728358 (27%) | 1778810 (2%)   | 678790 (1%)   |
|               | B4     | 87,997,294   | 64734596 (74%) | 21010828 (24%) | 1940694 (2%)   | 311176 (0%)   |
|               | B5     | 77,031,995   | 52807956 (69%) | 21464000 (28%) | 1957316 (3%)   | 804722 (1%)   |
|               | B6     | 67,982,906   | 49895320 (73%) | 16418898 (24%) | 1446812 (2%)   | 221872 (0%)   |
| HER2-Positive | C1     | 107,376,005  | 83112352 (77%) | 20711532 (19%) | 3099878 (3%)   | 452244 (0%)   |
|               | C2     | 76,173,402   | 58157296 (76%) | 15891740 (21%) | 1856422 (2%)   | 267940 (0%)   |
|               | C3     | 86,518,204   | 64519232 (75%) | 18548268 (21%) | 3087692 (4%)   | 363010 (0%)   |
|               | C4     | 90,930,481   | 67870968 (75%) | 19376264 (21%) | 3399408 (4%)   | 283844 (0%)   |
|               | C5     | 30,273,376   | 22253992 (74%) | 7007024 (23%)  | 912776 (3%)    | 99584 (0%)    |

Supplement Table 3: Read distribution summary showing where the aligned fragments map in human genome (Ensembl GRCh37.62 B.)

| <b>Group</b>  | <b>Sample</b> | <b>Exons</b> | <b>Introns</b> | <b>Intergenic</b> | <b>Junctions</b> |
|---------------|---------------|--------------|----------------|-------------------|------------------|
| TNBC          | A1            | 20492832     | 19959500       | 5617556           | 1434864          |
|               | A2            | 17356158     | 12182789       | 581590            | 12182789         |
|               | A3            | 23494250     | 17860829       | 10516303          | 949758           |
|               | A4            | 22756230     | 16460393       | 420267            | 1554030          |
|               | A5            | 20338611     | 14226532       | 936903            | 1408172          |
|               | A6            | 20820289     | 14245836       | 2028149           | 1470783          |
| Non-TNBC      | B1            | 42017270     | 22853064       | 5138262           | 3205088          |
|               | B2            | 25899214     | 20024335       | 3655221           | 1457139          |
|               | B3            | 28159959     | 21918952       | 3229893           | 1519656          |
|               | B4            | 32924717     | 29752607       | 4310404           | 1689159          |
|               | B5            | 27741918     | 21256627       | 3750244           | 1807929          |
|               | B6            | 34603957     | 34558818       | 2566045           | 1250095          |
| HER2-Positive | C1            | 42529319     | 42364696       | 2393313           | 1269324          |
|               | C2            | 29872983     | 27764770       | 1771141           | 1877579          |
|               | C3            | 36597306     | 28614421       | 2644367           | 1445994          |
|               | C4            | 36597306     | 28614421       | 2758681           | 1206588          |
|               | C5            | 13728557     | 8469355        | 1068602           | 804307           |

Supplement Table 4: Summary of total number of exons, unique exons and transcripts in each sample derived from cufflinks assembler using **A.** Ensembl GRCh37.62 **B.** hg19 UCSC database

**A**

| Groups        | Sample | Unique Exon | Total Exons | Transcripts | Genes |
|---------------|--------|-------------|-------------|-------------|-------|
| TNBC          | A1     | 716839      | 321539      | 84060       | 17649 |
|               | A2     | 656272      | 288266      | 74702       | 14950 |
|               | A3     | 699294      | 317925      | 80919       | 18290 |
|               | A4     | 694691      | 306919      | 81063       | 15983 |
|               | A5     | 704720      | 310450      | 81607       | 16222 |
|               | A6     | 681530      | 303291      | 78652       | 16119 |
| Non-TNBC      | B1     | 715570      | 321884      | 85784       | 16927 |
|               | B2     | 704781      | 313280      | 82424       | 16536 |
|               | B3     | 710214      | 317292      | 83440       | 16738 |
|               | B4     | 710414      | 315059      | 82310       | 16690 |
|               | B5     | 717966      | 321313      | 84562       | 17038 |
|               | B6     | 677214      | 298393      | 77423       | 15488 |
| HER2-Positive | C1     | 679650      | 304608      | 80737       | 15969 |
|               | C2     | 679026      | 300684      | 78453       | 15588 |
|               | C3     | 664540      | 294511      | 76028       | 15322 |
|               | C4     | 695274      | 308421      | 80675       | 16005 |
|               | C5     | 653898      | 282700      | 71913       | 14648 |

**B**

| Group         | Sample | Uniq Exons | Total Exons | Transcripts |
|---------------|--------|------------|-------------|-------------|
| TNBC          | A1     | 221390     | 541232      | 52859       |
|               | A2     | 198068     | 497645      | 46854       |
|               | A3     | 224390     | 537227      | 52535       |
|               | A4     | 205338     | 503748      | 48070       |
|               | A5     | 202729     | 500348      | 47288       |
|               | A6     | 206060     | 501733      | 47868       |
| Non-TNBC      | B1     | 215203     | 522329      | 50699       |
|               | B2     | 210217     | 509489      | 48738       |
|               | B3     | 212798     | 514139      | 49265       |
|               | B4     | 221390     | 541232      | 52859       |
|               | B5     | 197775     | 500814      | 46645       |
|               | B6     | 215374     | 529514      | 50794       |
| HER2-Positive | C1     | 204993     | 498805      | 48172       |
|               | C2     | 205010     | 507543      | 48171       |
|               | C3     | 202729     | 500348      | 47288       |
|               | C4     | 210066     | 517095      | 49146       |
|               | C5     | 197775     | 500814      | 46645       |

Supplement Table 5: The number of low (less than 1FPKM) and high (higher than 10FPKM) abundant transcripts as well as the total transcripts in each sample

| <b>Groups</b> | <b>Sample</b> | <b>FPKM Bins<br/>Sum &lt; 1</b> | <b>FPKM Bins<br/>Sum &gt; 10</b> | <b>Total<br/>Transcripts</b> |
|---------------|---------------|---------------------------------|----------------------------------|------------------------------|
| TNBC          | A1            | 30357                           | 1682                             | 84060                        |
|               | A2            | 27809                           | 1695                             | 74702                        |
|               | A3            | 32718                           | 1072                             | 80919                        |
|               | A4            | 29967                           | 1889                             | 81063                        |
|               | A5            | 30190                           | 1866                             | 81607                        |
|               | A6            | 29630                           | 1837                             | 78652                        |
| Non-TNBC      | B1            | 31078                           | 2718                             | 85784                        |
|               | B2            | 30541                           | 1639                             | 82424                        |
|               | B3            | 31462                           | 1602                             | 83440                        |
|               | B4            | 33895                           | 940                              | 82310                        |
|               | B5            | 32208                           | 1781                             | 84562                        |
|               | B6            | 30174                           | 1271                             | 77423                        |
| HER2-positive | C1            | 32762                           | 791                              | 80737                        |
|               | C2            | 30422                           | 1071                             | 78453                        |
|               | C3            | 31007                           | 877                              | 76028                        |
|               | C4            | 31886                           | 1042                             | 80675                        |
|               | C5            | 25212                           | 1842                             | 71913                        |

Supplement Table 6: Spearman Correlation coefficient of samples based on **A.** gene expression and **B.** Transcript expression in all three groups

**A**

|    | A1         | A2         | A3         | A4         | A5         | A6         | B1         | B2         | B3         | B4         | B5         | B6         | C1         | C2         | C3         | C4         | C5         |
|----|------------|------------|------------|------------|------------|------------|------------|------------|------------|------------|------------|------------|------------|------------|------------|------------|------------|
| A1 | 1          | 0.87581495 | 0.84580995 | 0.87722101 | 0.89228084 | 0.89539837 | 0.86336786 | 0.84083686 | 0.85160928 | 0.82669325 | 0.84199441 | 0.81801669 | 0.84577362 | 0.86078516 | 0.85717914 | 0.82529943 | 0.83915184 |
| A2 | 0.87581495 | 1          | 0.84790882 | 0.88860495 | 0.90576319 | 0.88769479 | 0.84883352 | 0.83961738 | 0.8437133  | 0.84228234 | 0.8400857  | 0.80345409 | 0.82341552 | 0.82953797 | 0.82575579 | 0.81599948 | 0.85273936 |
| A3 | 0.84580995 | 0.84790882 | 1          | 0.85347546 | 0.85828002 | 0.84759419 | 0.85522917 | 0.84750292 | 0.86839949 | 0.86697511 | 0.85801779 | 0.82309945 | 0.8601228  | 0.79738037 | 0.85263336 | 0.84736033 | 0.86030732 |
| A4 | 0.87722101 | 0.88860495 | 0.85347546 | 1          | 0.90409093 | 0.89307829 | 0.86063108 | 0.83931558 | 0.85532384 | 0.83939435 | 0.84656279 | 0.80590217 | 0.83332102 | 0.83258441 | 0.83302458 | 0.81586678 | 0.85052524 |
| A5 | 0.89228084 | 0.90576319 | 0.85828002 | 0.90409093 | 1          | 0.89791797 | 0.87524738 | 0.8556358  | 0.87045706 | 0.86162926 | 0.86544489 | 0.81799633 | 0.85000335 | 0.83870471 | 0.8487111  | 0.83184121 | 0.86894388 |
| A6 | 0.89539837 | 0.88769479 | 0.84759419 | 0.89307829 | 0.89791797 | 1          | 0.85399708 | 0.82479321 | 0.83914283 | 0.82388806 | 0.83338861 | 0.80166261 | 0.82762487 | 0.84837773 | 0.84267663 | 0.81437577 | 0.84785515 |
| B1 | 0.86336786 | 0.84883352 | 0.85522917 | 0.86063108 | 0.87524738 | 0.85399708 | 1          | 0.88753421 | 0.89927185 | 0.86736602 | 0.89760482 | 0.86328544 | 0.84153387 | 0.80936511 | 0.85425824 | 0.83335448 | 0.86428318 |
| B2 | 0.84083686 | 0.83961738 | 0.84750292 | 0.83931558 | 0.8556358  | 0.82479321 | 0.88753421 | 1          | 0.94043242 | 0.87459642 | 0.90748765 | 0.87712056 | 0.83950598 | 0.80407648 | 0.8399397  | 0.83790925 | 0.86092111 |
| B3 | 0.85160928 | 0.8437133  | 0.86839949 | 0.85532384 | 0.87045706 | 0.83914283 | 0.89927185 | 0.94043242 | 1          | 0.8907349  | 0.92914532 | 0.88036983 | 0.86313361 | 0.81259747 | 0.85723982 | 0.85199703 | 0.87511963 |
| B4 | 0.82669325 | 0.84228234 | 0.86697511 | 0.83939435 | 0.86162926 | 0.82388806 | 0.86736602 | 0.87459642 | 0.8907349  | 1          | 0.8783913  | 0.84671091 | 0.86114426 | 0.79223611 | 0.8463195  | 0.85636599 | 0.8748681  |
| B5 | 0.84199441 | 0.8400857  | 0.85801779 | 0.84656279 | 0.86544489 | 0.83338861 | 0.89760482 | 0.90748765 | 0.92914532 | 0.8783913  | 1          | 0.88221316 | 0.84132556 | 0.79325651 | 0.84155794 | 0.83747637 | 0.86508113 |
| B6 | 0.81801669 | 0.80345409 | 0.82309945 | 0.80590217 | 0.81799633 | 0.80166261 | 0.86328544 | 0.87712056 | 0.88036983 | 0.84671091 | 0.88221316 | 1          | 0.83011785 | 0.78783987 | 0.83468077 | 0.82573832 | 0.83991437 |
| C1 | 0.84577362 | 0.82341552 | 0.8601228  | 0.83332102 | 0.85000335 | 0.82762487 | 0.84153387 | 0.83950598 | 0.86313361 | 0.86114426 | 0.84132556 | 0.83011785 | 1          | 0.8333189  | 0.89540517 | 0.87862711 | 0.8562385  |
| C2 | 0.86078516 | 0.82953797 | 0.79738037 | 0.83258441 | 0.83870471 | 0.84837773 | 0.80936511 | 0.80407648 | 0.81259747 | 0.79223611 | 0.79325651 | 0.78783987 | 0.8333189  | 1          | 0.84424187 | 0.8159075  | 0.80242458 |
| C3 | 0.85717914 | 0.82575579 | 0.85263336 | 0.83302458 | 0.8487111  | 0.84267663 | 0.85425824 | 0.8399397  | 0.85723982 | 0.8463195  | 0.84155794 | 0.83468077 | 0.89540517 | 0.84424187 | 1          | 0.8740703  | 0.86537531 |
| C4 | 0.82529943 | 0.81599948 | 0.84736033 | 0.81586678 | 0.83184121 | 0.81437577 | 0.83335448 | 0.83790925 | 0.85199703 | 0.85636599 | 0.83747637 | 0.82573832 | 0.87862711 | 0.8159075  | 0.8740703  | 1          | 0.84760375 |
| C5 | 0.83915184 | 0.85273936 | 0.86030732 | 0.85052524 | 0.86894388 | 0.84785515 | 0.86428318 | 0.86092111 | 0.87511963 | 0.8748681  | 0.86508113 | 0.83991437 | 0.8562385  | 0.80242458 | 0.86537531 | 0.84760375 | 1          |

**B**

|    | A1         | A2         | A3         | A4         | A5         | A6         | B1         | B2         | B3         | B4         | B5         | B6         | C1         | C2         | C3         | C4         | C5         |
|----|------------|------------|------------|------------|------------|------------|------------|------------|------------|------------|------------|------------|------------|------------|------------|------------|------------|
| A1 | 1          | 0.6920937  | 0.68075316 | 0.70825257 | 0.72121784 | 0.7312966  | 0.71227691 | 0.68066585 | 0.69065701 | 0.65178146 | 0.69098879 | 0.6454114  | 0.65053717 | 0.66857475 | 0.67272699 | 0.63216381 | 0.65536595 |
| A2 | 0.6920937  | 1          | 0.65805478 | 0.73564509 | 0.7471427  | 0.70380477 | 0.70210404 | 0.69148137 | 0.69586135 | 0.65525115 | 0.69556395 | 0.62877982 | 0.61869159 | 0.62661019 | 0.63432784 | 0.61562996 | 0.65808681 |
| A3 | 0.68075316 | 0.65805478 | 1          | 0.66648036 | 0.66944902 | 0.68115204 | 0.67730926 | 0.6700699  | 0.69150549 | 0.67960817 | 0.68629205 | 0.64038098 | 0.66066147 | 0.61435368 | 0.65854039 | 0.64458529 | 0.65924974 |
| A4 | 0.70825257 | 0.73564509 | 0.66648036 | 1          | 0.75401281 | 0.72095712 | 0.72612975 | 0.69511989 | 0.70446611 | 0.66299577 | 0.70943327 | 0.63136093 | 0.63828502 | 0.64100646 | 0.64851956 | 0.62344349 | 0.66493747 |
| A5 | 0.72121784 | 0.7471427  | 0.66944902 | 0.75401281 | 1          | 0.72059161 | 0.73386962 | 0.70660322 | 0.72003279 | 0.67889373 | 0.72255802 | 0.64451527 | 0.64652519 | 0.64110428 | 0.65493605 | 0.6318421  | 0.68158892 |
| A6 | 0.7312966  | 0.70380477 | 0.68115204 | 0.72095712 | 0.72059161 | 1          | 0.70035569 | 0.66244473 | 0.67684202 | 0.64812958 | 0.68093762 | 0.62836823 | 0.63012231 | 0.6479903  | 0.65180498 | 0.62034423 | 0.66407799 |
| B1 | 0.71227691 | 0.70210404 | 0.67730926 | 0.72612975 | 0.73386962 | 0.70035569 | 1          | 0.74025237 | 0.75302782 | 0.68585039 | 0.76087106 | 0.69026124 | 0.65173031 | 0.63831542 | 0.67288781 | 0.64427871 | 0.69130039 |
| B2 | 0.68066585 | 0.69148137 | 0.6700699  | 0.69511989 | 0.70660322 | 0.66244473 | 0.74025237 | 1          | 0.7906518  | 0.69355617 | 0.76243351 | 0.69873372 | 0.6494727  | 0.62915597 | 0.65761847 | 0.64981198 | 0.68124671 |
| B3 | 0.69065701 | 0.69586135 | 0.69150549 | 0.70446611 | 0.72003279 | 0.67684202 | 0.75302782 | 0.7906518  | 1          | 0.70800093 | 0.79004624 | 0.70091309 | 0.66573268 | 0.63531418 | 0.66960948 | 0.66021628 | 0.69401598 |
| B4 | 0.65178146 | 0.65525115 | 0.67960817 | 0.66299577 | 0.67889373 | 0.64812958 | 0.68585039 | 0.69355617 | 0.70800093 | 1          | 0.70001041 | 0.68970594 | 0.69556764 | 0.64475294 | 0.68954028 | 0.69442598 | 0.7036168  |
| B5 | 0.69098879 | 0.69556395 | 0.68629205 | 0.70943327 | 0.72255802 | 0.68093762 | 0.76087106 | 0.76243351 | 0.79004624 | 0.70001041 | 1          | 0.7059017  | 0.65105709 | 0.61757751 | 0.65592586 | 0.64877225 | 0.69084752 |
| B6 | 0.6454114  | 0.62877982 | 0.64038098 | 0.63136093 | 0.64451527 | 0.62836823 | 0.69026124 | 0.69873372 | 0.70091309 | 0.68970594 | 0.7059017  | 1          | 0.6680185  | 0.6409413  | 0.68016487 | 0.6632465  | 0.67626726 |
| C1 | 0.65053717 | 0.61869159 | 0.66066147 | 0.63828502 | 0.64652519 | 0.63012231 | 0.65173031 | 0.6494727  | 0.66573268 | 0.69556764 | 0.65105709 | 0.6680185  | 1          | 0.68912106 | 0.73886142 | 0.71958596 | 0.66850272 |
| C2 | 0.66857475 | 0.62661019 | 0.61435368 | 0.64100646 | 0.64110428 | 0.6479903  | 0.63831542 | 0.62915597 | 0.63531418 | 0.64475294 | 0.61757751 | 0.6409413  | 0.68912106 | 1          | 0.6969237  | 0.66747065 | 0.63556426 |
| C3 | 0.67272699 | 0.63432784 | 0.65854039 | 0.64851956 | 0.65493605 | 0.65180498 | 0.67288781 | 0.65761847 | 0.66960948 | 0.68954028 | 0.65592586 | 0.68016487 | 0.73886142 | 0.6969237  | 1          | 0.71485656 | 0.685548   |
| C4 | 0.63216381 | 0.61562996 | 0.64458529 | 0.62344349 | 0.6318421  | 0.62034423 | 0.64427871 | 0.64981198 | 0.66021628 | 0.69442598 | 0.64877225 | 0.6632465  | 0.71958596 | 0.66747065 | 0.71485656 | 1          | 0.66166842 |
| C5 | 0.65536595 | 0.65808681 | 0.65924974 | 0.66493747 | 0.68158892 | 0.66407799 | 0.69130039 | 0.68124671 | 0.69401598 | 0.7036168  | 0.69084752 | 0.67626726 | 0.66850272 | 0.63556426 | 0.685548   | 0.66166842 | 1          |

Supplement Table 7: Pair wise differentially expressing transcripts matrix generated from cuffdiff statistical analysis between each sample. The transcripts used for the analysis are reconstructed using **A.** Ensembl GRCh37.62 **B.** hg19 UCSC database

**A**

|    | A1   | A2   | A3   | A4   | A5   | A6   | A    | B1   | B2   | B3   | B4   | B5   | B6   | B    | C1   | C2   | C3   | C4   | C5   | C    |
|----|------|------|------|------|------|------|------|------|------|------|------|------|------|------|------|------|------|------|------|------|
| A1 |      | 4624 | 4437 | 4212 | 3962 | 3938 | 835  | 5449 | 4456 | 4131 | 4553 | 4557 | 4774 |      | 4696 | 4389 | 5009 | 4890 | 4604 |      |
| A2 | 4624 |      | 4937 | 2242 | 2217 | 2501 | 447  | 5017 | 3599 | 3709 | 3892 | 3827 | 3431 |      | 4565 | 3949 | 2139 | 3544 | 4121 |      |
| A3 | 4437 | 4937 |      | 4726 | 4449 | 4296 | 1200 | 6125 | 4506 | 4160 | 4090 | 4336 | 4720 |      | 5604 | 4624 | 4847 | 4559 | 4336 |      |
| A4 | 4212 | 2242 | 4726 |      | 2359 | 2648 | 522  | 4445 | 3641 | 3652 | 3951 | 3677 | 3788 |      | 4578 | 4022 | 2997 | 3895 | 4161 |      |
| A5 | 3962 | 2217 | 4449 | 2359 |      | 2632 | 447  | 4350 | 3429 | 3348 | 3712 | 3506 | 3551 |      | 4546 | 3898 | 3915 | 3810 | 4005 |      |
| A6 | 3962 | 2501 | 4296 | 2648 | 2632 |      | 530  | 4877 | 3968 | 3792 | 4117 | 3924 | 3791 |      | 4400 | 3922 | 3052 | 3840 | 4125 |      |
| A  | 3962 | 447  | 1200 | 522  | 447  | 530  |      |      |      |      |      |      |      |      |      |      |      |      |      |      |
| B1 | 3962 | 5017 | 6125 | 4445 | 4350 | 4877 |      |      | 4372 | 4222 | 5328 | 4111 | 5082 | 1317 | 6128 | 5404 | 5167 | 5687 | 5705 |      |
| B2 | 3962 | 3599 | 4506 | 3641 | 3429 | 3968 |      | 4372 |      | 2189 | 3380 | 2854 | 3180 | 531  | 4654 | 3841 | 3711 | 3630 | 3802 |      |
| B3 | 3962 | 3709 | 4160 | 3652 | 3348 | 3792 |      | 4222 | 2189 |      | 3149 | 2399 | 3104 | 455  | 4447 | 3567 | 3664 | 3455 | 3552 |      |
| B4 | 3962 | 3892 | 4090 | 3951 | 3712 | 4117 |      | 5328 | 3380 | 3149 |      | 3706 | 3278 | 839  | 4383 | 3348 | 3668 | 3089 | 3087 |      |
| B5 | 3962 | 3827 | 4336 | 3677 | 3506 | 3924 |      | 4111 | 2854 | 2399 | 3706 |      | 3414 | 563  | 5054 | 4213 | 4046 | 4156 | 4173 |      |
| B6 | 3962 | 3431 | 4720 | 3788 | 3551 | 3791 |      | 5082 | 3180 | 3104 | 3278 | 3414 |      | 771  | 4388 | 3408 | 2909 | 3162 | 3500 |      |
| B  |      |      |      |      |      |      |      | 1317 | 531  | 455  | 839  | 563  | 771  |      |      |      |      |      |      |      |
| C1 | 4696 | 4565 | 5604 | 4578 | 4546 | 4400 |      | 6128 | 4654 | 4447 | 4383 | 5054 | 4388 |      |      | 3523 | 4865 | 3873 | 3476 | 1069 |
| C2 | 4389 | 3949 | 4624 | 4022 | 3898 | 3922 |      | 5404 | 3841 | 3567 | 3348 | 4213 | 3408 |      | 3523 |      | 3551 | 2735 | 2503 | 567  |
| C3 | 5009 | 2139 | 4847 | 2997 | 3915 | 3052 |      | 5167 | 3711 | 3664 | 3668 | 4046 | 2909 |      | 4865 | 3551 |      | 3249 | 3843 | 1326 |
| C4 | 4890 | 3544 | 4559 | 3895 | 3810 | 3840 |      | 5687 | 3630 | 3455 | 3089 | 4156 | 3162 |      | 3873 | 2735 | 3249 |      | 2441 | 590  |
| C5 | 4604 | 4121 | 4336 | 4161 | 4005 | 4125 |      | 5705 | 3802 | 3552 | 3087 | 4173 | 3500 |      | 3476 | 2503 | 3843 | 2441 |      | 621  |
| C  |      |      |      |      |      |      |      |      |      |      |      |      |      |      | 1069 | 567  | 1326 | 590  | 621  |      |

**B**

|    | A1   | A2   | A3   | A4   | A5   | A6   | A    | B1   | B2   | B3   | B4   | B5   | B6   | B    | C1   | C2   | C3   | C4   | C5   | C    |
|----|------|------|------|------|------|------|------|------|------|------|------|------|------|------|------|------|------|------|------|------|
| A1 |      | 4624 | 4437 | 4212 | 3962 | 3938 | 835  | 5449 | 4456 | 4131 | 4553 | 4557 | 4774 |      | 4696 | 4389 | 5009 | 4890 | 4604 |      |
| A2 | 4624 |      | 4937 | 2242 | 2217 | 2501 | 447  | 5017 | 3599 | 3709 | 3892 | 3827 | 3431 |      | 4565 | 3949 | 2139 | 3544 | 4121 |      |
| A3 | 4437 | 4937 |      | 4726 | 4449 | 4296 | 1200 | 6125 | 4506 | 4160 | 4090 | 4336 | 4720 |      | 5604 | 4624 | 4847 | 4559 | 4336 |      |
| A4 | 4212 | 2242 | 4726 |      | 2359 | 2648 | 522  | 4445 | 3641 | 3652 | 3951 | 3677 | 3788 |      | 4578 | 4022 | 2997 | 3895 | 4161 |      |
| A5 | 3962 | 2217 | 4449 | 2359 |      | 2632 | 447  | 4350 | 3429 | 3348 | 3712 | 3506 | 3551 |      | 4546 | 3898 | 3915 | 3810 | 4005 |      |
| A6 | 3938 | 2501 | 4296 | 2648 | 2632 |      | 530  | 4877 | 3968 | 3792 | 4117 | 3924 | 3791 |      | 4400 | 3922 | 3052 | 3840 | 4125 |      |
| A  | 835  | 447  | 1200 | 522  | 447  | 530  |      |      |      |      |      |      |      |      |      |      |      |      |      |      |
| B1 | 5449 | 5017 | 6125 | 4445 | 4350 | 4877 |      |      | 4372 | 4222 | 5328 | 4111 | 5082 | 1317 | 6128 | 5404 | 5167 | 5687 | 5705 |      |
| B2 | 4456 | 3599 | 4506 | 3641 | 3429 | 3968 |      | 4372 |      | 2189 | 3380 | 2854 | 3180 | 531  | 4654 | 3841 | 3711 | 3630 | 3802 |      |
| B3 | 4131 | 3709 | 4160 | 3652 | 3348 | 3792 |      | 4222 | 2189 |      | 3149 | 2399 | 3104 | 455  | 4447 | 3567 | 3664 | 3455 | 3552 |      |
| B4 | 4553 | 3892 | 4090 | 3951 | 3712 | 4117 |      | 5328 | 3380 | 3149 |      | 3706 | 3278 | 839  | 4383 | 3348 | 3668 | 3089 | 3087 |      |
| B5 | 4557 | 3827 | 4336 | 3677 | 3506 | 3924 |      | 4111 | 2854 | 2399 | 3706 |      | 3414 | 563  | 5054 | 4213 | 4046 | 4156 | 4173 |      |
| B6 | 4774 | 3431 | 4720 | 3788 | 3551 | 3791 |      | 5082 | 3180 | 3104 | 3278 | 3414 |      | 771  | 4388 | 3408 | 2909 | 3162 | 3500 |      |
| B  |      |      |      |      |      |      |      | 1317 | 531  | 455  | 839  | 563  | 771  |      |      |      |      |      |      |      |
| C1 | 4696 | 4565 | 5604 | 4578 | 4546 | 4400 |      | 6128 | 4654 | 4447 | 4383 | 5054 | 4388 |      |      | 3523 | 4865 | 3873 | 3476 | 1069 |
| C2 | 4389 | 3949 | 4624 | 4022 | 3898 | 3922 |      | 5404 | 3841 | 3567 | 3348 | 4213 | 3408 |      | 3523 |      | 3551 | 2735 | 2503 | 567  |
| C3 | 5009 | 2139 | 4847 | 2997 | 3915 | 3052 |      | 5167 | 3711 | 3664 | 3668 | 4046 | 2909 |      | 4865 | 3551 |      | 3249 | 3843 | 1326 |
| C4 | 4890 | 3544 | 4559 | 3895 | 3810 | 3840 |      | 5687 | 3630 | 3455 | 3089 | 4156 | 3162 |      | 3873 | 2735 | 3249 |      | 2441 | 590  |
| C5 | 4604 | 4121 | 4336 | 4161 | 4005 | 4125 |      | 5705 | 3802 | 3552 | 3087 | 4173 | 3500 |      | 3476 | 2503 | 3843 | 2441 |      | 621  |
| C  |      |      |      |      |      |      |      |      |      |      |      |      |      |      | 1069 | 567  | 1326 | 590  | 621  |      |



Supplement Table 8: (A) The exons identified from intronic region and the number of transcripts that contain them (B) The table showing how many transcripts contain how many “exons from introns”.

**A**

| Group         | Sample | Total transcripts that comprise "exon from intron" | Unique transcripts that comprise "exon from intron" event | Common exons from intron event | Common exons from intron event |
|---------------|--------|----------------------------------------------------|-----------------------------------------------------------|--------------------------------|--------------------------------|
| TNBC          | A1     | 191153                                             | 26689                                                     | 285                            | 78                             |
|               | A2     | 26438                                              | 6870                                                      |                                |                                |
|               | A3     | 234030                                             | 32580                                                     |                                |                                |
|               | A4     | 39079                                              | 9826                                                      |                                |                                |
|               | A5     | 83672                                              | 13229                                                     |                                |                                |
|               | A6     | 64458                                              | 13110                                                     |                                |                                |
| Non-TNBC      | B1     | 88865                                              | 15243                                                     | 317                            |                                |
|               | B2     | 97652                                              | 16356                                                     |                                |                                |
|               | B3     | 101187                                             | 17049                                                     |                                |                                |
|               | B4     | 102636                                             | 15749                                                     |                                |                                |
|               | B5     | 89480                                              | 17080                                                     |                                |                                |
|               | B6     | 53946                                              | 10316                                                     |                                |                                |
| HER2-Positive | C1     | 158371                                             | 17196                                                     | 244                            |                                |
|               | C2     | 111892                                             | 14753                                                     |                                |                                |
|               | C3     | 83672                                              | 13229                                                     |                                |                                |
|               | C4     | 128482                                             | 15711                                                     |                                |                                |
|               | C5     | 13269                                              | 4439                                                      |                                |                                |

**B**

| Group         | Sample | Number of Exons |     |       |      |                |
|---------------|--------|-----------------|-----|-------|------|----------------|
|               |        | One             | Two | Three | Four | Five and above |
| TNBC          | A1     | 189952          | 468 | 46    | 14   | 12             |
|               | A2     | 26050           | 168 | 12    | 3    | 1              |
|               | A3     | 232652          | 530 | 59    | 22   | 10             |
|               | A4     | 38558           | 226 | 13    | 3    | 3              |
|               | A5     | 50481           | 232 | 20    | 8    | 4              |
|               | A6     | 63875           | 250 | 21    | 4    | 1              |
| Non-TNBC      | B1     | 88087           | 304 | 32    | 10   | 5              |
|               | B2     | 96690           | 373 | 43    | 17   | 4              |
|               | B3     | 100275          | 343 | 51    | 7    | 7              |
|               | B4     | 101873          | 293 | 27    | 5    | 12             |
|               | B5     | 88626           | 342 | 45    | 6    | 1              |
|               | B6     | 53404           | 209 | 24    | 8    | 4              |
| HER2 Positive | C1     | 157419          | 366 | 33    | 18   | 8              |
|               | C2     | 111209          | 276 | 23    | 7    | 5              |
|               | C3     | 82974           | 266 | 37    | 8    | 4              |
|               | C4     | 127711          | 306 | 28    | 11   | 6              |
|               | C5     | 12992           | 117 | 13    |      | 1              |

Supplement Table 9: (A) The number of un annotated transcripts identified in each sample.  
 (B) The table showing how many un annotated transcripts contain how many exons.

**A**

| Group         | Sample | Previously unannotated Exons | Total number of transcripts that are unannotated | Total number of primary transcripts associated with unannotated transcript |
|---------------|--------|------------------------------|--------------------------------------------------|----------------------------------------------------------------------------|
| TNBC          | A1     | 55138                        | 1021                                             | 871                                                                        |
|               | A2     | 5145                         | 393                                              | 353                                                                        |
|               | A3     | 148326                       | 1081                                             | 936                                                                        |
|               | A4     | 7754                         | 553                                              | 488                                                                        |
|               | A5     | 8992                         | 601                                              | 531                                                                        |
|               | A6     | 10500                        | 582                                              | 536                                                                        |
| Non-TNBC      | B1     | 15894                        | 855                                              | 757                                                                        |
|               | B2     | 17976                        | 776                                              | 670                                                                        |
|               | B3     | 19061                        | 838                                              | 720                                                                        |
|               | B4     | 19115                        | 840                                              | 710                                                                        |
|               | B5     | 20668                        | 927                                              | 814                                                                        |
|               | B6     | 10684                        | 393                                              | 544                                                                        |
| HER2-Positive | C1     | 23736                        | 816                                              | 705                                                                        |
|               | C2     | 15307                        | 626                                              | 539                                                                        |
|               | C3     | 16398                        | 681                                              | 575                                                                        |
|               | C4     | 18506                        | 735                                              | 639                                                                        |
|               | C5     | 3988                         | 338                                              | 303                                                                        |

**B**

| Group         | Sample | No. of Exons |       |      |      |     |       |       |      |      |
|---------------|--------|--------------|-------|------|------|-----|-------|-------|------|------|
|               |        | Two          | Three | Four | Five | Six | Seven | Eight | Nine | Ten+ |
| TNBC          | A1     | 733          | 149   | 66   | 39   | 16  | 7     | 5     | 5    | 2    |
|               | A2     | 232          | 63    | 47   | 33   | 9   | 2     | 5     | 3    | 0    |
|               | A3     | 826          | 166   | 47   | 24   | 10  | 6     | 1     | 2    | 0    |
|               | A4     | 358          | 97    | 43   | 22   | 15  | 8     | 5     | 2    | 4    |
|               | A5     | 384          | 113   | 52   | 32   | 7   | 9     | 5     | 0    | 0    |
|               | A6     | 385          | 111   | 43   | 23   | 9   | 6     | 4     | 0    | 2    |
| Non-TNBC      | B1     | 553          | 151   | 64   | 38   | 16  | 11    | 10    | 3    | 10   |
|               | B2     | 504          | 149   | 62   | 27   | 15  | 9     | 2     | 0    | 9    |
|               | B3     | 562          | 145   | 57   | 33   | 15  | 8     | 5     | 4    | 10   |
|               | B4     | 554          | 139   | 60   | 43   | 13  | 15    | 6     | 5    | 6    |
|               | B5     | 648          | 152   | 52   | 41   | 12  | 7     | 7     | 1    | 8    |
|               | B6     | 389          | 113   | 54   | 34   | 17  | 12    | 8     | 2    | 10   |
| HER2 Positive | C1     | 486          | 132   | 74   | 37   | 29  | 19    | 13    | 9    | 18   |
|               | C2     | 383          | 104   | 51   | 42   | 21  | 14    | 6     | 1    | 5    |
|               | C3     | 419          | 114   | 67   | 38   | 13  | 13    | 7     | 0    | 11   |
|               | C4     | 449          | 141   | 68   | 25   | 17  | 17    | 11    | 2    | 5    |
|               | C5     | 185          | 70    | 41   | 22   | 9   | 5     | 3     | 0    | 4    |

Supplement Table 10: Microarray analysis data collection

**GEO Datasets used for Microarray Analysis:**

**GPL96**

| <b>GEO ID</b> | <b>No. of Samples</b> |             |                       |
|---------------|-----------------------|-------------|-----------------------|
|               | <b>non-TNBC</b>       | <b>TNBC</b> | <b>HER-2 Positive</b> |
| GSE7390       | 8                     | 39          | 12                    |
| GSE2603       | 4                     | 32          | 3                     |
| GSE3494       | 4                     | 30          | 21                    |
| GSE2990       | 2                     | 24          | 13                    |
| GSE2034       | 13                    | 56          | 19                    |
| GSE11121      | 4                     | 22          | 10                    |
| GSE1561       | 2                     | 18          | 4                     |
| GSE20194      | 5                     | 68          | 25                    |
| <b>Total</b>  | <b>42</b>             | <b>289</b>  | <b>107</b>            |

**GPL570**

| <b>GEO ID</b> | <b>No. of Samples</b> |             |                       |
|---------------|-----------------------|-------------|-----------------------|
|               | <b>non-TNBC</b>       | <b>TNBC</b> | <b>HER-2 Positive</b> |
| GSE7904       | 0                     | 21          | 6                     |
| GSE2109       | 5                     | 94          | 28                    |
| GSE19615      | 3                     | 36          | 10                    |
| GSE12276      | 8                     | 64          | 22                    |
| <b>Total</b>  | <b>16</b>             | <b>215</b>  | <b>66</b>             |

Supplement Table 11: Differentially expressing genes from the microarray analysis is compared against the RNA sequencing comparison

| <b>GLP750</b>             |                |                   |              |                 |               |
|---------------------------|----------------|-------------------|--------------|-----------------|---------------|
| <b>Comparison</b>         | <b>RNA-Seq</b> | <b>MicroArray</b> | <b>Agree</b> | <b>Disagree</b> | <b>%Agree</b> |
| Non-TNBC Vs HER2-positive | 2616           | 385               | 113          | 0               | 100           |
| TNBC Vs HER2-positive     | 3088           | 1323              | 167          | 11              | 93.82022472   |
| TNBC Vs Non-TNBC          | 2971           | 2033              | 562          | 2               | 99.64539007   |
| <b>GPL96</b>              |                |                   |              |                 |               |
| <b>Comparison</b>         | <b>RNA-Seq</b> | <b>MicroArray</b> | <b>Agree</b> | <b>Disagree</b> | <b>%Agree</b> |
| Non-TNBC Vs HER2-positive | 2616           | 231               | 32           | 4               | 88.88888889   |
| TNBC Vs HER2-positive     | 3088           | 593               | 144          | 11              | 92.90322581   |
| TNBC Vs Non-TNBC          | 2971           | 734               | 316          | 1               | 99.68454259   |

Supplement Table 12: Gene signature comparison of this mRNA sequencing study compared against the published microarray based gene signatures.

**A**

| Hu Classifier (Overlapping gene names are shown in Table 12B) |                        |                                |                             |                                           |
|---------------------------------------------------------------|------------------------|--------------------------------|-----------------------------|-------------------------------------------|
| Breast cancer Comparison                                      | Genes found in RNA-Seq | Microarray Intrinsic Gene List | Genes found in both studies | Genes following the same expression trend |
| Non-TNBC Vs HER2-positive                                     | 2972                   | 306                            | 73                          | 58                                        |
| TNBC Vs HER2-positive                                         | 3089                   | 306                            | 76                          | 50                                        |
| TNBC Vs Non-TNBC                                              | 2617                   | 306                            | 77                          | 73                                        |

**B**

| Comparison of the gene signature found in Hu et al against mRNA sequencing findings |                                   |                             | PDCD5    | PDHA1  | IL13RA1  |
|-------------------------------------------------------------------------------------|-----------------------------------|-----------------------------|----------|--------|----------|
| Non-TNBC vs HER-2 positive comparison                                               | TNBC vs HER-2 positive comparison | TNBC Vs Non-TNBC comparison | PDXDC1   | PDIA4  | IMPA2    |
| AHCYL1                                                                              | AK2                               | AHCYL1                      | PHYH     | PDXDC1 | KIAA0020 |
| AMFR                                                                                | BUB1                              | AMFR                        | PIGT     | PISD   | KRT18    |
| ATP6AP1                                                                             | CASP7                             | ASF1A                       | POLB     | PLOD1  | LFNG     |
| BAG4                                                                                | CBR4                              | BLVRA                       | PRR13    | PRKACB | MFAP2    |
| BLVRA                                                                               | CD59                              | BUB3                        | PSMC6    | PRKCI  | MMP1     |
| BUB3                                                                                | CDC123                            | C10orf116                   | PTGER3   | RABEP1 | MMP7     |
| C10orf116                                                                           | CDH3                              | C4A                         | RCAN1    | RBX1   | MXI1     |
| CCNH                                                                                | CHI3L1                            | CBR4                        | RNF10    | RCC1   | NFIB     |
| CD38                                                                                | CHI3L2                            | CCNG2                       | RRAGA    | SKP1   | NINJ1    |
| CENPF                                                                               | CIR1                              | CCNH                        | SLC39A6  | SOX4   | NMI      |
| CES2                                                                                | CLTC                              | CDH3                        | SLC9A3R1 | STAT1  | NRIP1    |
| CLGN                                                                                | CP                                | CENPF                       | SOD2     | TFF3   | PCM1     |
| CX3CL1                                                                              | CRABP1                            | CHI3L1                      | SRPK1    | WDR26  | PDCD4    |
| DNAJC12                                                                             | CSRP2                             | CHI3L2                      | STAT1    | WNK1   | PDIA4    |
| DUSP6                                                                               | DUSP4                             | CKS1B                       | SYNGR1   |        | PIGT     |
| ERBB2                                                                               | DUSP6                             | CLGN                        | TCEAL1   |        | PISD     |
| ESR1                                                                                | ERBB2                             | CLTC                        | TOP2B    |        | PLOD1    |
| FUT8                                                                                | FUBP1                             | CRABP1                      | TSG101   |        | PPP2R5A  |
| GART                                                                                | GRB7                              | CSRP2                       | WNK1     |        | PRKACB   |
| GATA3                                                                               | GSTK1                             | CX3CL1                      | YIF1A    |        | PRNP     |
| GRB7                                                                                | H3F3B                             | DNAJC12                     | ZBTB4    |        | PRR13    |
| GSTK1                                                                               | HTATIP2                           | DUSP4                       | ZNF24    |        | PTGER3   |
| GSTM3                                                                               | ID4                               | EIF2C2                      |          |        | RFC4     |
| HTATIP2                                                                             | IFI30                             | ESR1                        |          |        | RNF10    |
| IFI6                                                                                | IFI6                              | FABP7                       |          |        | SDC1     |
| IGFBP2                                                                              | IGBP1                             | FOXC1                       |          |        | SFRP1    |
| IRF9                                                                                | IMPA2                             | FUBP1                       |          |        | SKP1     |
| ISG15                                                                               | KDM5A                             | FUCA1                       |          |        | SLC39A6  |
| MMP7                                                                                | KRT18                             | FUT8                        |          |        | SLC9A3R1 |
| MYO6                                                                                | MFAP2                             | GATA3                       |          |        | SOX4     |
| NDUFB5                                                                              | MXI1                              | GATM                        |          |        | STAT1    |
| NINJ1                                                                               | NMI                               | GSTM3                       |          |        | SYNGR1   |
| PCM1                                                                                | PAPSS2                            | ID4                         |          |        | TCEAL1   |
| PDCD4                                                                               | PDCD5                             | IGBP1                       |          |        | TFF3     |
|                                                                                     |                                   |                             |          |        | TP53BP2  |
|                                                                                     |                                   |                             |          |        | TYMS     |
|                                                                                     |                                   |                             |          |        | ZNF24    |

C

| <b>Perou et al., 2001</b>                          |                              |                                                    |                              |
|----------------------------------------------------|------------------------------|----------------------------------------------------|------------------------------|
| <b>Basal signature genes found in mRNA seq and</b> |                              | <b>ERBB2 signature genes found in mRNA seq and</b> |                              |
| <b>TNBC vs Non-TNBC</b>                            | <b>TNBC vs HER2-positive</b> | <b>Non-TNBC vs HER2-positive</b>                   | <b>TNBC vs HER2-positive</b> |
| <b>Overlap</b>                                     | <b>Overlap</b>               | <b>Overlap</b>                                     | <b>Overlap</b>               |
| ANXA1                                              | ANXA1                        | ERBB2                                              | ERBB2                        |
| DUSP6                                              | CX3CL1                       | GRB7                                               | GRB7                         |
| KRT17                                              | KRT17                        | SMARCC2                                            | SMARCC2                      |
| LAMC2                                              | KRT5                         |                                                    |                              |
| MMP14                                              | LAMC2                        |                                                    |                              |

D

| <b>Sorlie et al., 2001</b>                                          |                                                                |                                                                         |
|---------------------------------------------------------------------|----------------------------------------------------------------|-------------------------------------------------------------------------|
| <b>TNBC vs HER2-positive genes found in mRNA seq and Microarray</b> | <b>TNBC vs Non-TNBC genes found in mRNA seq and Microarray</b> | <b>Non-TNBC vs HER2-positive genes found in mRNA seq and Microarray</b> |
| CDH3                                                                | CDH3                                                           | ERBB2                                                                   |
| CHI3L2                                                              | CHI3L2                                                         | GRB7                                                                    |
| KRT17                                                               | CX3CL1                                                         | SMARCE1                                                                 |
|                                                                     | FABP7                                                          | TGFB1                                                                   |
|                                                                     | KRT17                                                          |                                                                         |
|                                                                     | KRT5                                                           |                                                                         |
|                                                                     | NFIB                                                           |                                                                         |
|                                                                     | SLPI                                                           |                                                                         |

E

| <b>Sorlie et al., 2006</b>                                          |                                                                |
|---------------------------------------------------------------------|----------------------------------------------------------------|
| <b>TNBC vs HER2-positive genes found in mRNA seq and Microarray</b> | <b>TNBC vs Non-TNBC genes found in mRNA seq and Microarray</b> |
| AGR2                                                                | ABAT                                                           |
| ANXA1                                                               | AGR2                                                           |
| CHST3                                                               | ANXA1                                                          |
| CREB3L4                                                             | CDK6                                                           |
| KRT23                                                               | CHST3                                                          |
| MLPH                                                                | CREB3L4                                                        |
| NMB                                                                 | CTSL2                                                          |
| TFF3                                                                | DNAJC12                                                        |
|                                                                     | EGFR                                                           |
|                                                                     | EN1                                                            |
|                                                                     | FABP7                                                          |
|                                                                     | FBP1                                                           |
|                                                                     | GABRP                                                          |
|                                                                     | KRT23                                                          |
|                                                                     | LMO4                                                           |
|                                                                     | MLPH                                                           |
|                                                                     | PSAT1                                                          |
|                                                                     | S100A8                                                         |
|                                                                     | S100B                                                          |
|                                                                     | SCRG1                                                          |
|                                                                     | SLC27A2                                                        |
|                                                                     | SLPI                                                           |
|                                                                     | SUSD3                                                          |
|                                                                     | TFF3                                                           |
|                                                                     | ZNF552                                                         |

F

| <b>Parker et al., 2009</b>                                              |                                                                     |                                                                |
|-------------------------------------------------------------------------|---------------------------------------------------------------------|----------------------------------------------------------------|
| <b>Non-TNBC vs HER2-positive genes found in mRNA seq and Microarray</b> | <b>TNBC vs HER2-positive genes found in mRNA seq and Microarray</b> | <b>TNBC vs Non-TNBC genes found in mRNA seq and Microarray</b> |
| BAG1                                                                    | ACTR3B                                                              | ACTR3B                                                         |
| BCL2                                                                    | BLVRA                                                               | ANLN                                                           |
| BLVRA                                                                   | CCNE1                                                               | BAG1                                                           |
| CENPF                                                                   | CDC20                                                               | BCL2                                                           |
| CXXC5                                                                   | CDH3                                                                | BLVRA                                                          |
| ERBB2                                                                   | ERBB2                                                               | CCNE1                                                          |
| ESR1                                                                    | FOXA1                                                               | CDC20                                                          |
| GRB7                                                                    | GPR160                                                              | CDH3                                                           |
| MDM2                                                                    | GRB7                                                                | CENPF                                                          |
| MIA                                                                     | KIF2C                                                               | CXXC5                                                          |
| MKI67                                                                   | KRT17                                                               | EGFR                                                           |
| MLPH                                                                    | MLPH                                                                | ESR1                                                           |
| MMP11                                                                   | TMEM45B                                                             | FOXA1                                                          |
| NAT1                                                                    |                                                                     | FOXC1                                                          |
| PGR                                                                     |                                                                     | GPR160                                                         |
| SLC39A6                                                                 |                                                                     | KRT14                                                          |
|                                                                         |                                                                     | KRT17                                                          |
|                                                                         |                                                                     | KRT5                                                           |
|                                                                         |                                                                     | MDM2                                                           |
|                                                                         |                                                                     | MIA                                                            |
|                                                                         |                                                                     | MLPH                                                           |
|                                                                         |                                                                     | NAT1                                                           |
|                                                                         |                                                                     | PGR                                                            |
|                                                                         |                                                                     | SFRP1                                                          |
|                                                                         |                                                                     | SLC39A6                                                        |
|                                                                         |                                                                     | TYMS                                                           |

Supplement figure 1: The transcript model of HSP19B1 comprising 18 exons including the chromosome location from UCSC genome browser is shown in blue. The reassembled HSP19B1 complete transcript including all the 18 exons in all 17 samples shown in different colours.

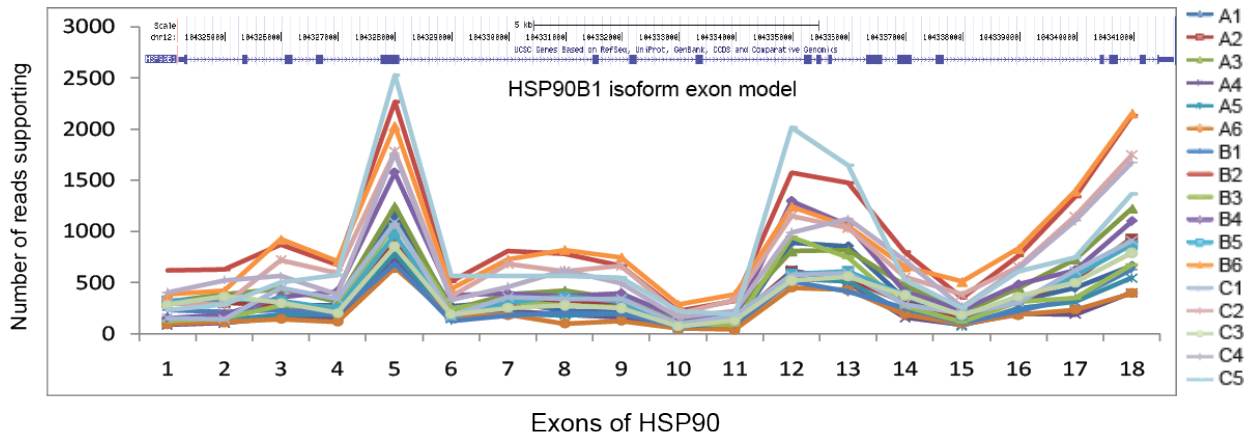

Supplement figure2: Transcripts distribution overview in each group. The average of expressed transcripts from each sample of the group was derived from cufflinks assembler using **A.** Ensembl GRCh37.62 **B.** hg19 UCSC database

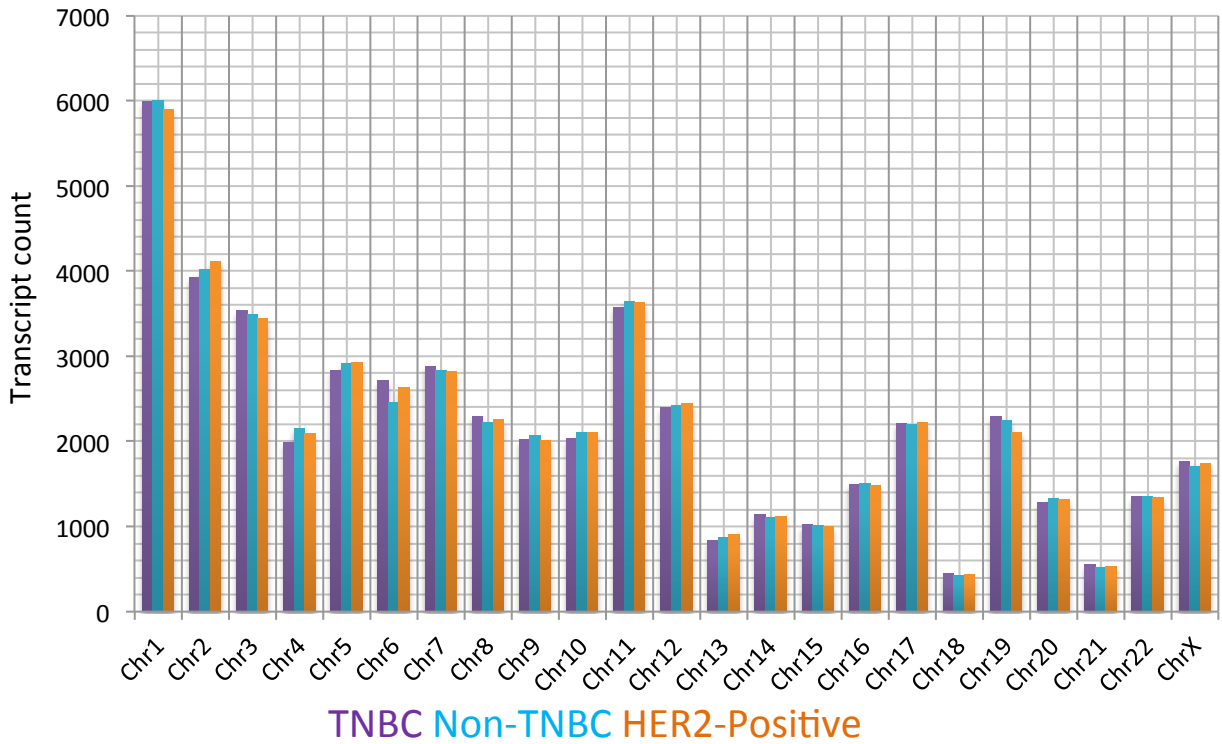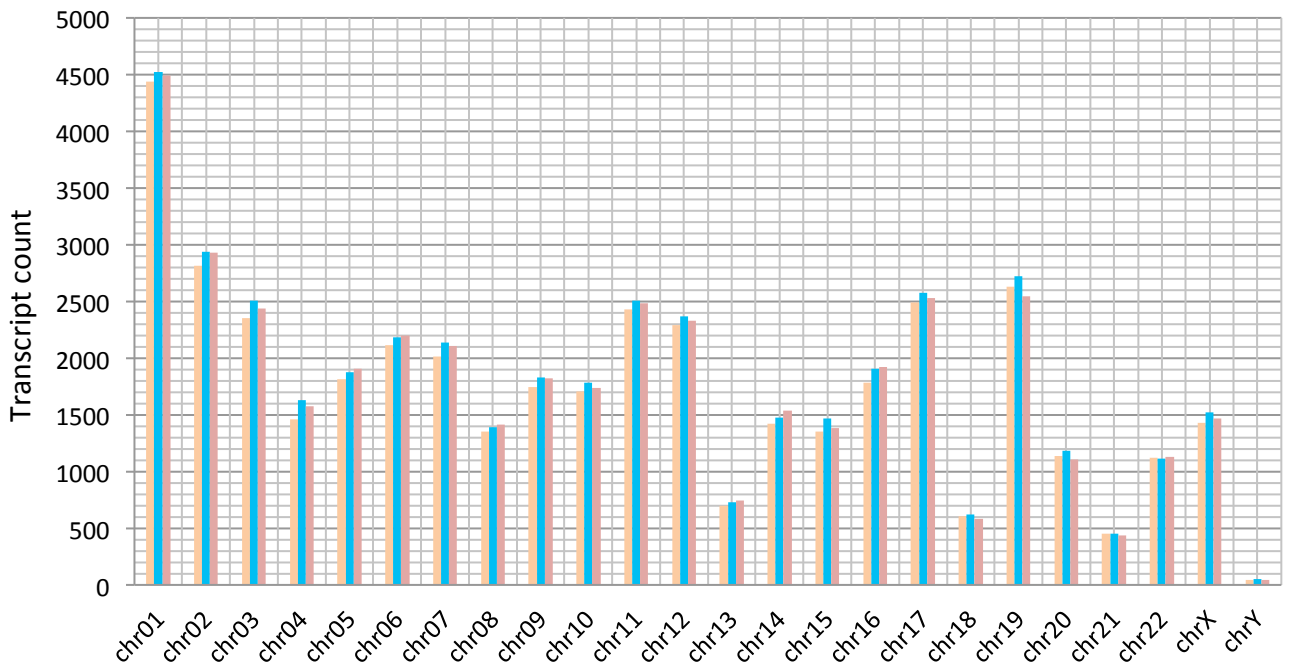



Supplement figure 3: FPKM Bins of low abundant transcripts reassembled from cufflinks assembler using Ensembl GRCh37.62 in **A. TNBC** **B. Non-TNBC** and **C. Her2-Positive Expression Transcripts**

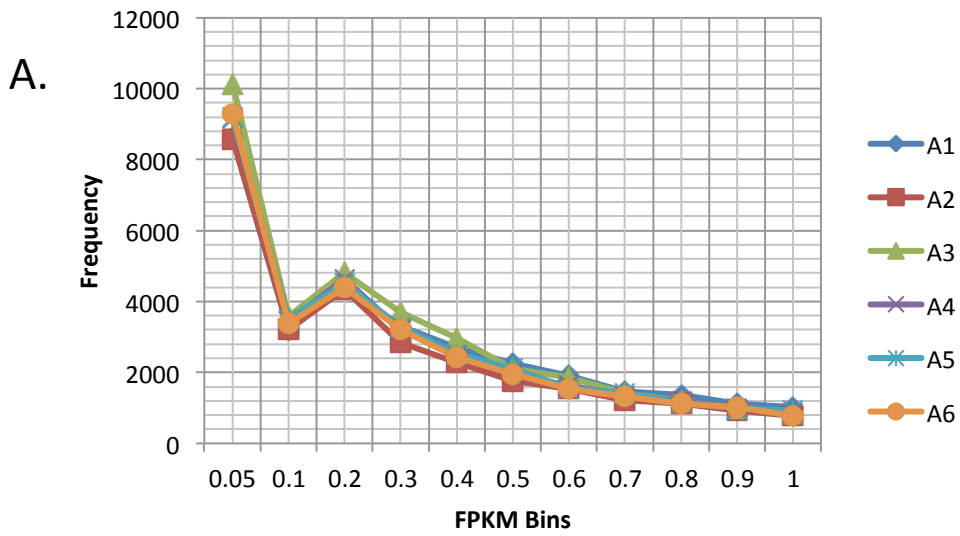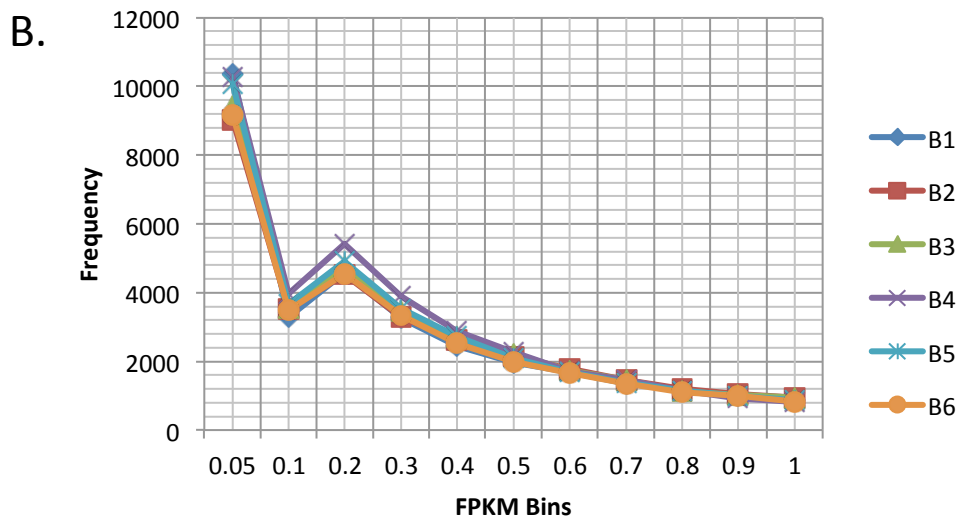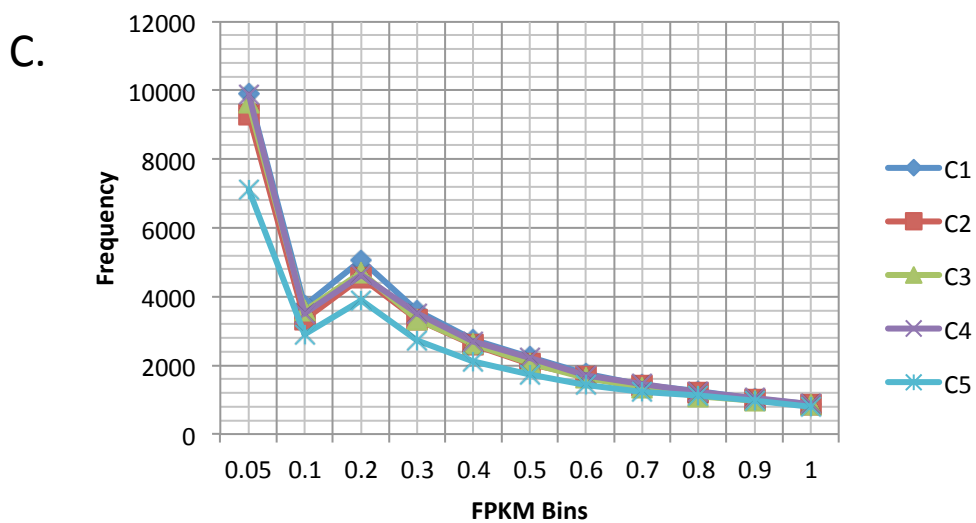

Supplement Figure 4: FPKM Bins of medium abundant transcripts reassembled from cufflinks assembler using Ensembl GRCh37.62 in **A. TNBC** **B. Non-TNBC** and **C. Her2-Positive Expression Transcripts**

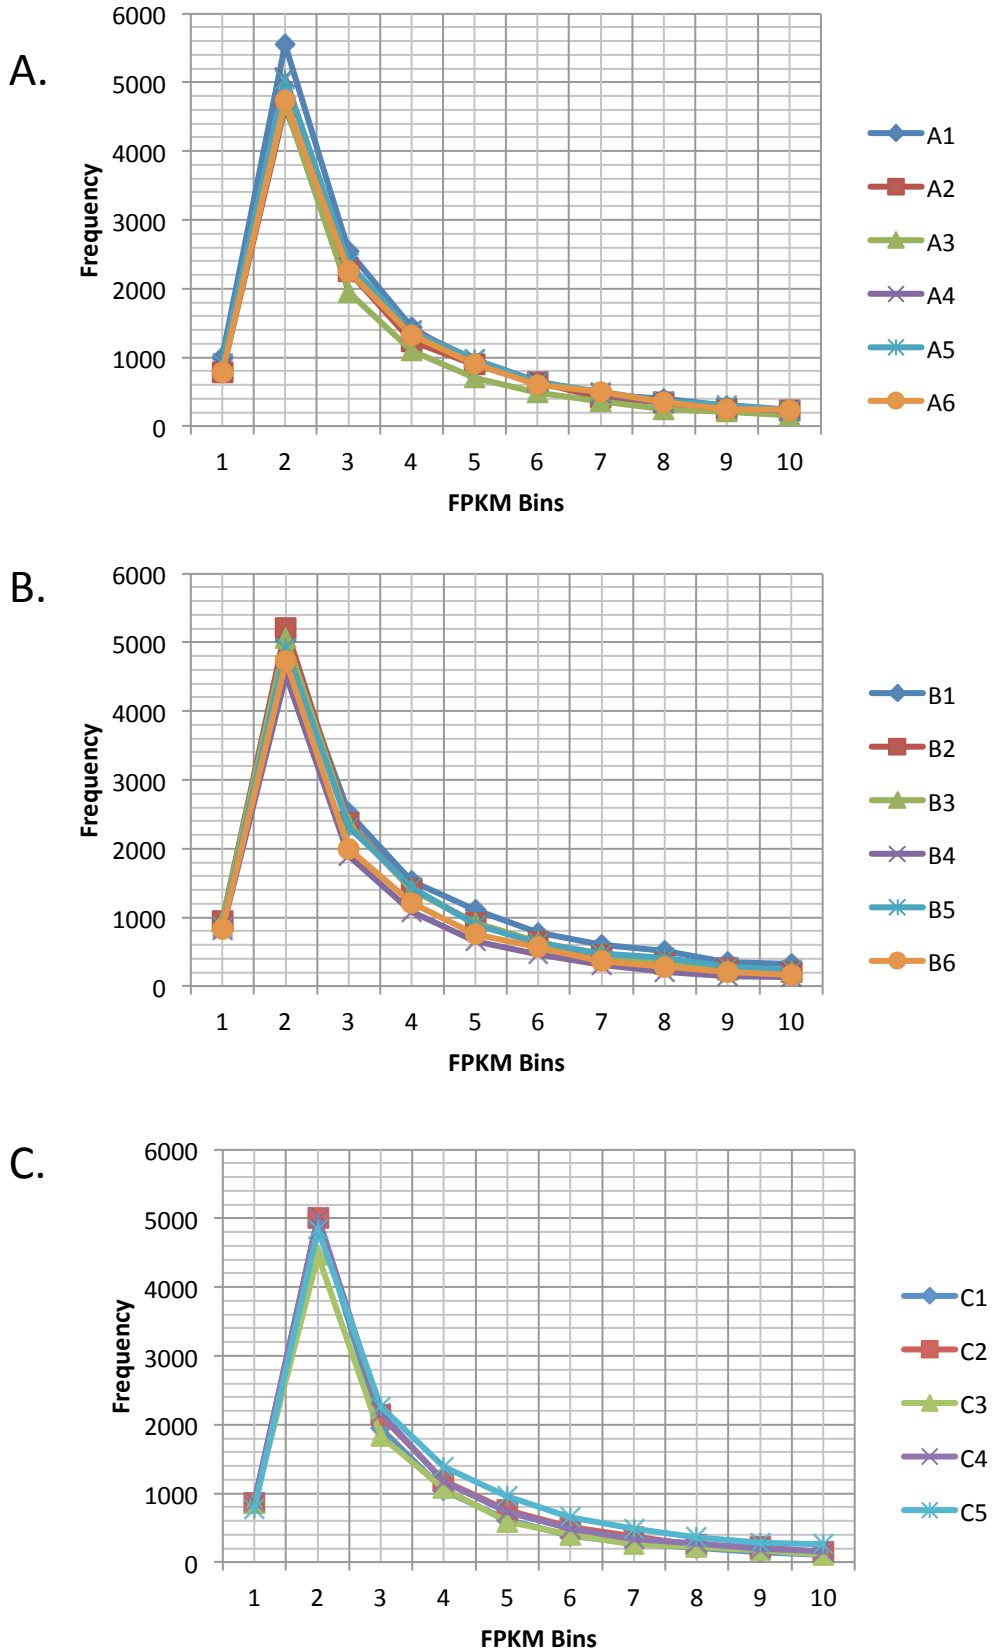

Supplement figure 5: FPKM Bins of high abundant transcripts reassembled from cufflinks assembler using Ensembl GRCh37.62 in **A.** TNBC **B.** Non-TNBC and **C.** Her2-Positive Expression Transcripts

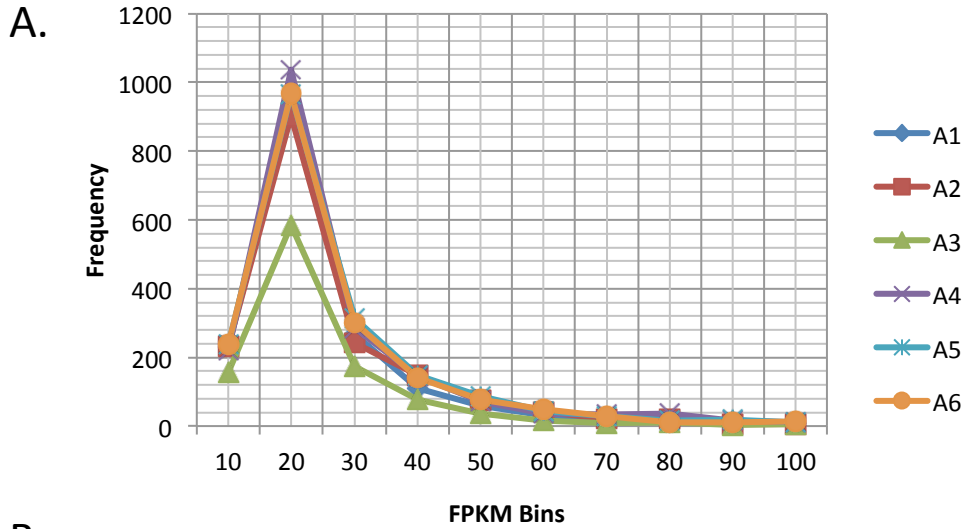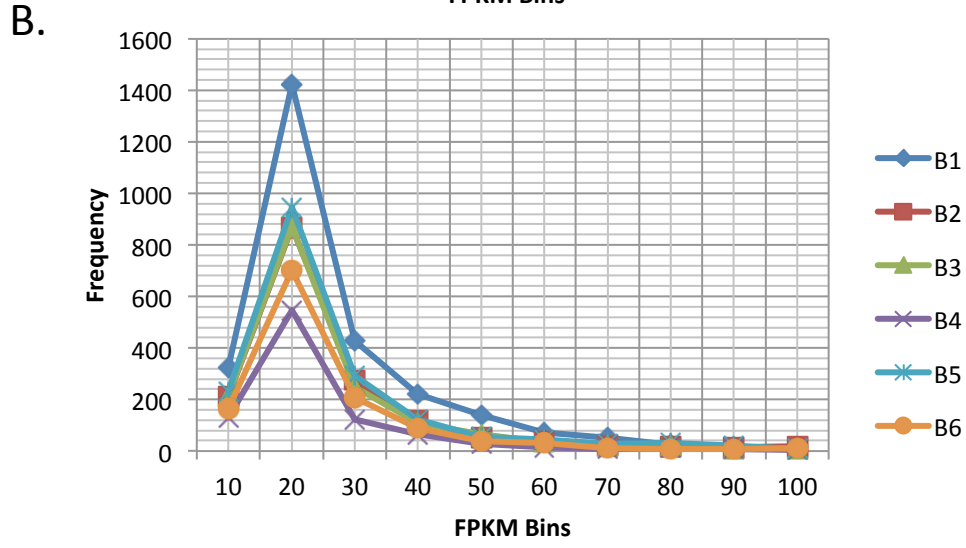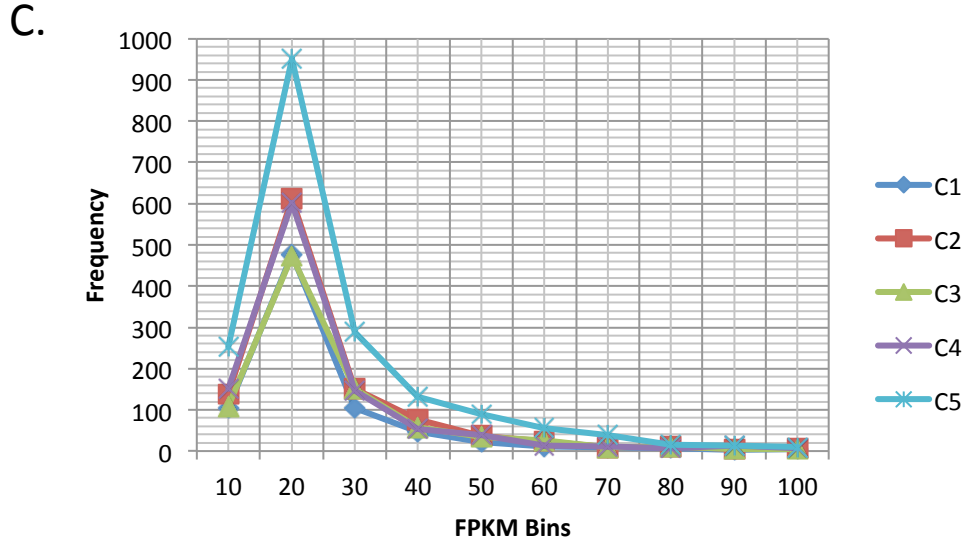

Supplement figure 6: FPKM Bins of low abundant transcripts reassembled from cufflinks assembler using UCSCChg19 in **A. TNBC** **B. Non-TNBC** and **C. Her2-Positive Expression Transcripts**

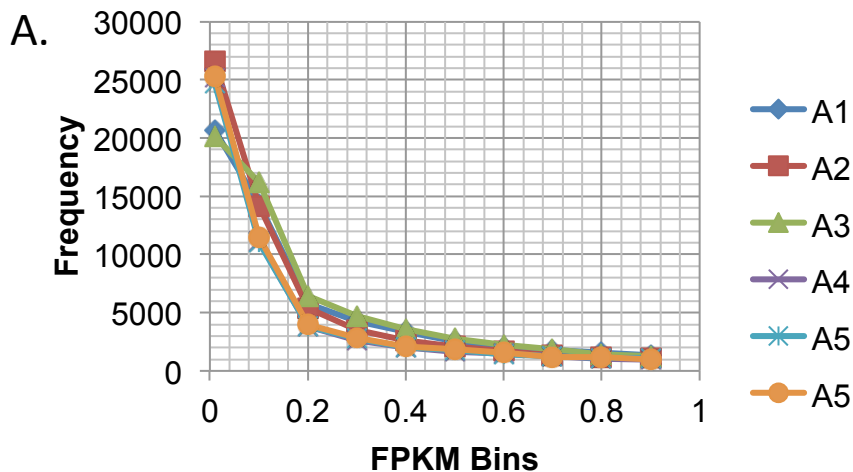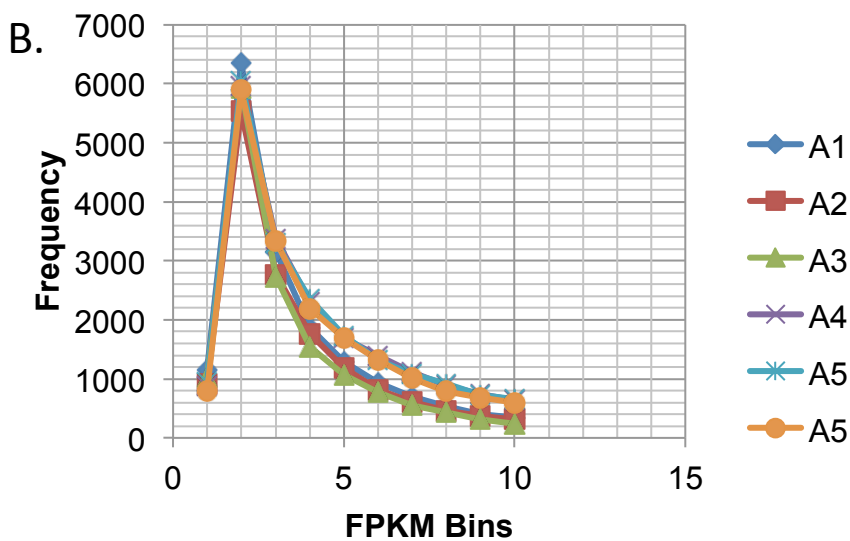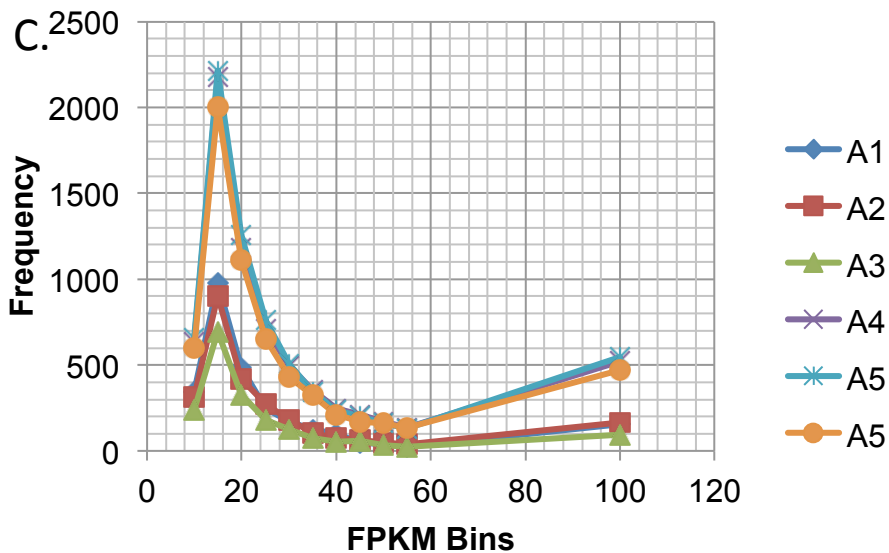

Supplement Figure 7: FPKM Bins of medium abundant transcripts reassembled from cufflinks assembler using UCSCChg19 in **A. TNBC** **B. Non-TNBC** and **C. Her2-Positive Expression Transcripts**

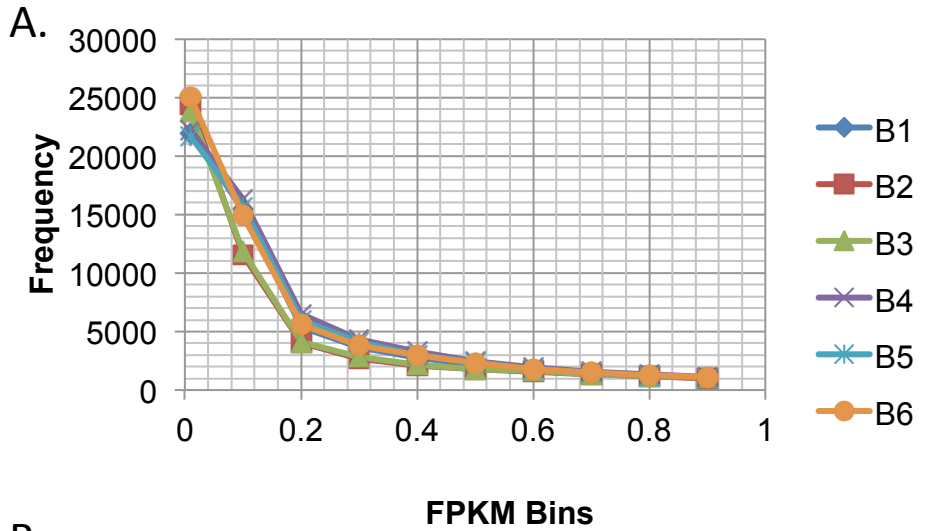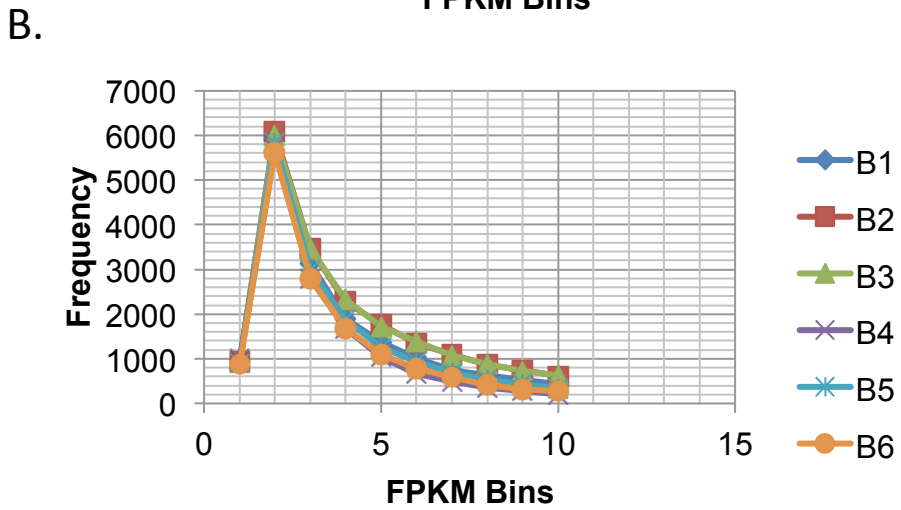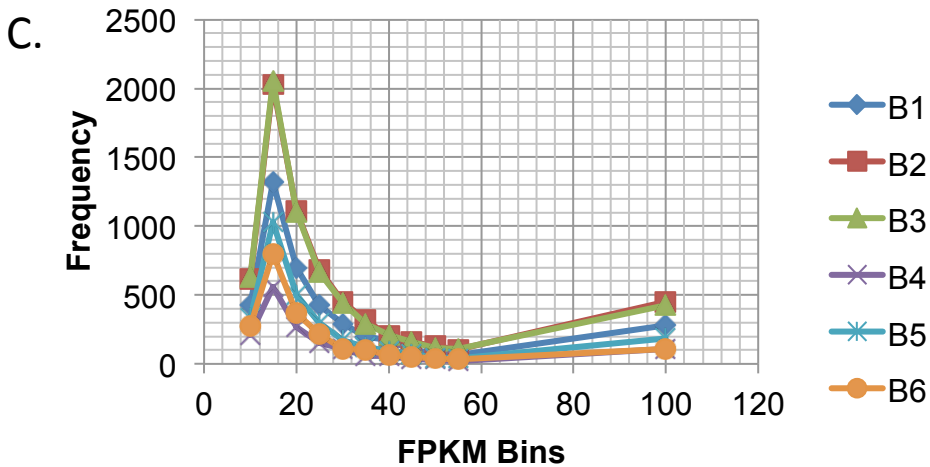

Supplement Figure 8: FPKM Bins of high abundant transcripts reassembled from cufflinks assembler using UCSCChg19 in **A.** TNBC **B.** Non-TNBC and **C.** Her2-Positive Expression Transcripts

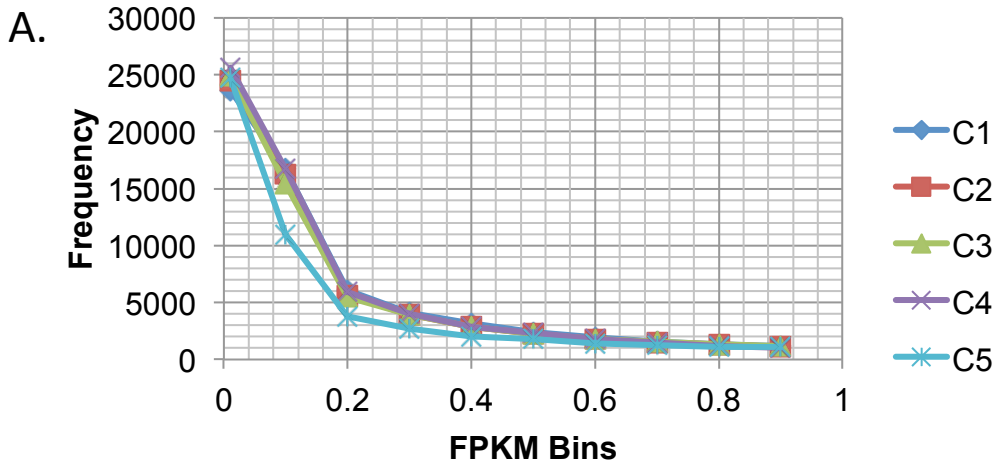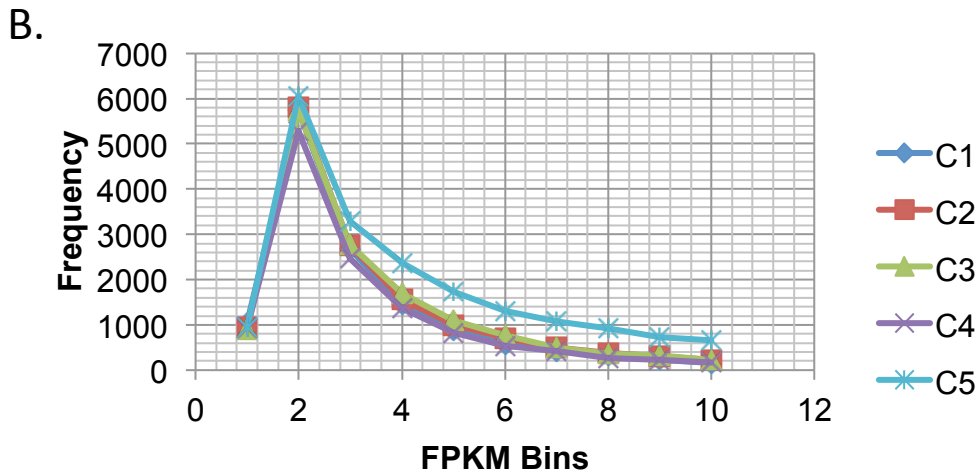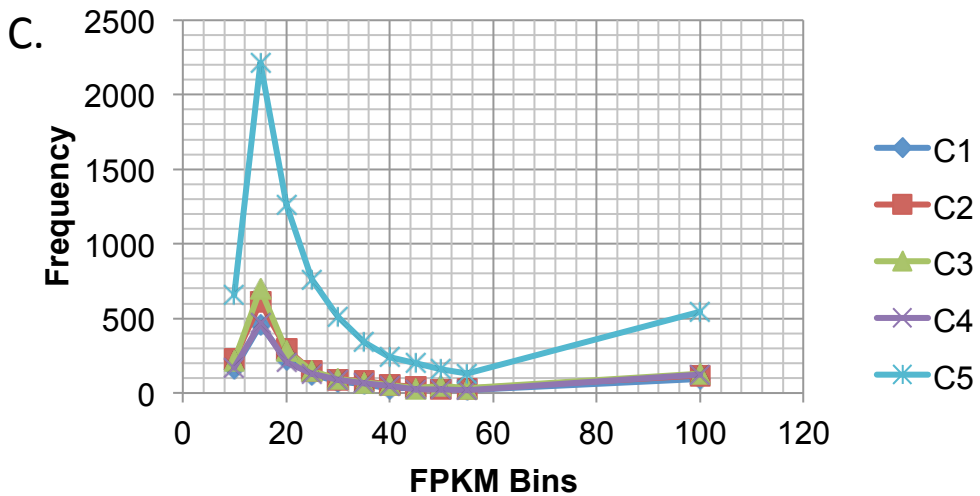

Supplement Figure 9: To highlight the scope of individual variations between the samples in each group the expression profile close up of chromosome 6 from all the six samples of **(A)** TNBC **(B)** Non-TNBC and **(C)** HER2 positive groups are shown as circo plot. The total number of transcripts (above FPKM 0.01) in chromosome 6 in each sample is provided in brackets next to the sample label.

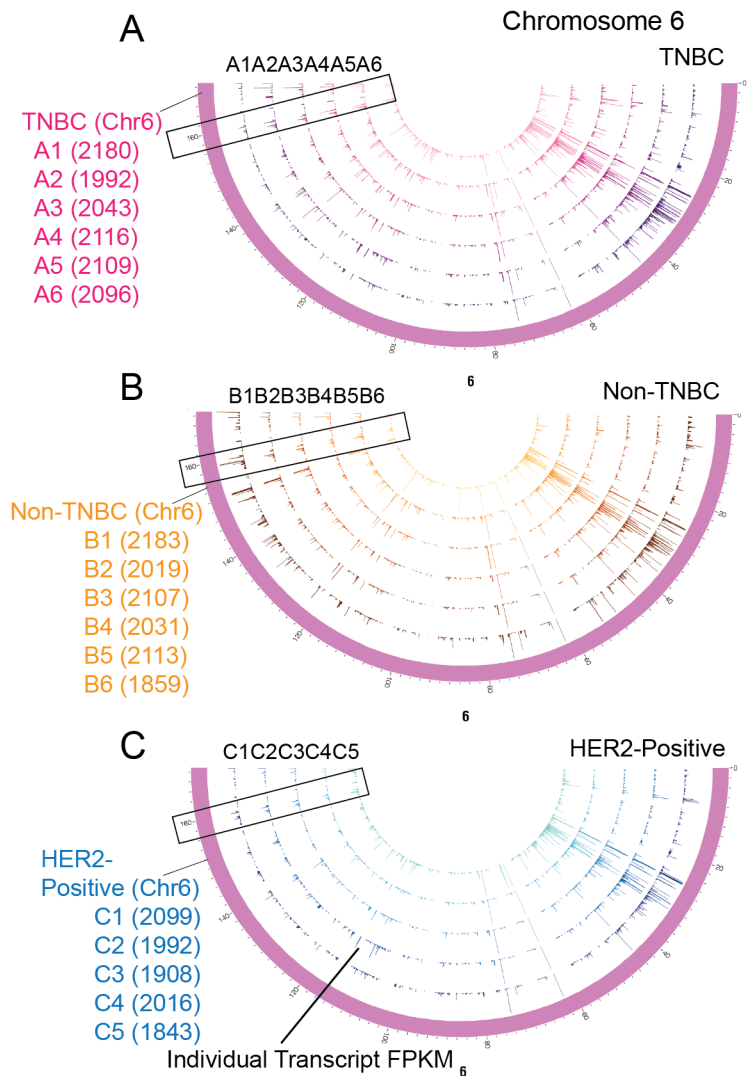

Supplement Figure 10: **(A)** Spearman correlation coefficient based heat map of all 17 samples based on gene expression. **(B)** Dendrogram showing the distance metric relationship between all of the samples. The correlations were computed separately for each pair of tissues and clustered according to similarity using average linkage hierarchical clustering.

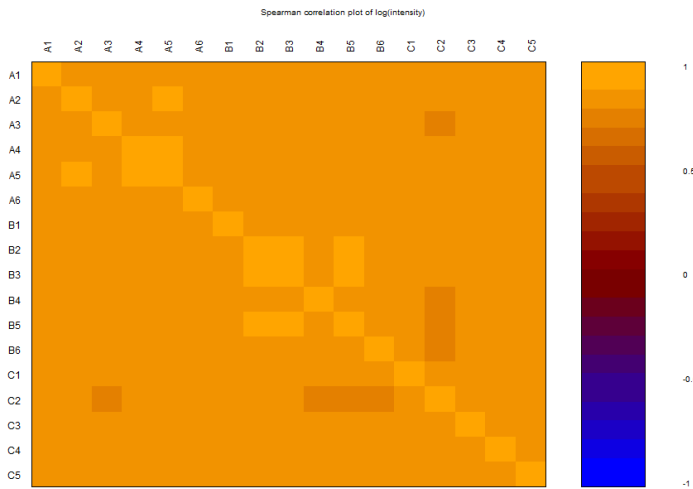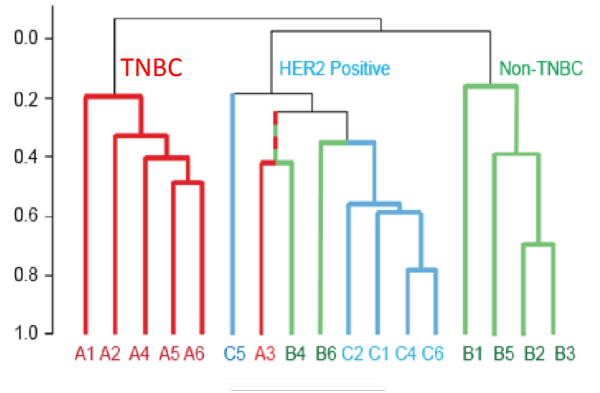



Supplement Figure 11: The schematic showing individual comparisons of the differentially expressing transcripts from

**A.** The cuffdiff statistical analysis of differentially expressed transcripts from the Ensembl (Figures AB) and UCSC reference (Figures CD) based transcripts assembly. Pairwise cuffdiff analysis of the transcript expression profile within each group identified high confidence statistically significant transcripts. As an example, the number of statistically significant transcripts expressed by the pairwise comparison of A1 versus the rest of the group is shown. From the pairwise comparisons of all of the samples within each group, the common transcripts present in all pairwise comparisons related to one specific sample against the rest of the group; i.e., 2455 transcripts in the case of A1 versus the rest of the group were detected.

**B.** The above mentioned statistical analysis for the whole sample set is presented as a matrix. Higher number of common statistically significant transcripts indicates a possible divergence of that specific sample from the whole group, and these diverging outliers are coloured red.

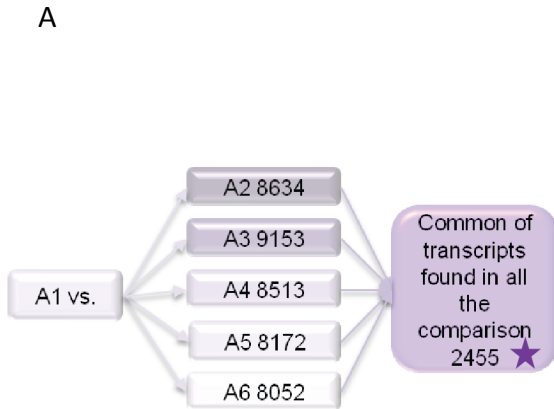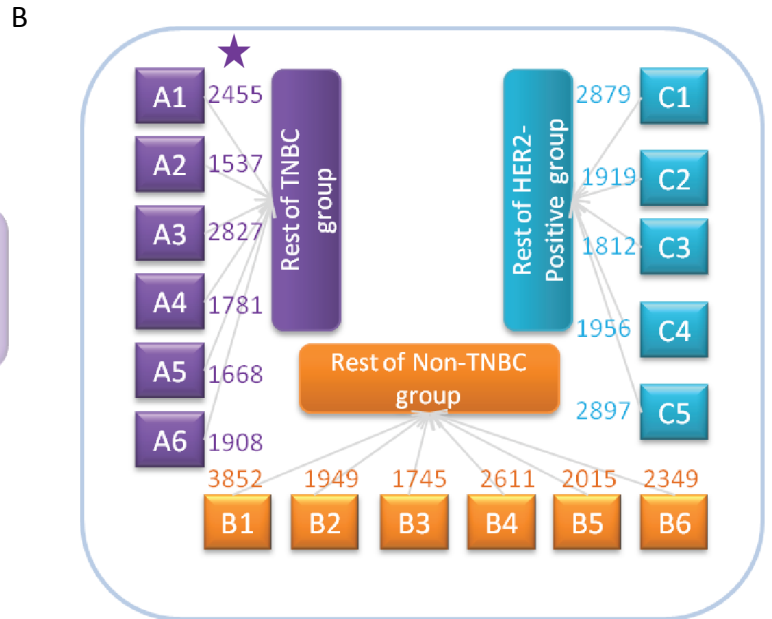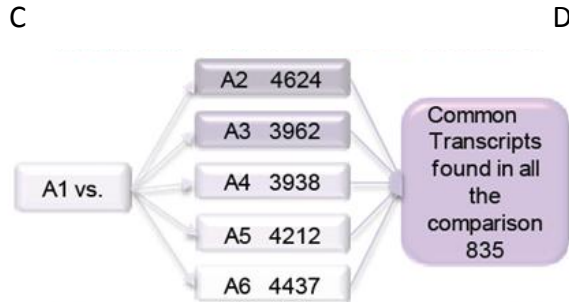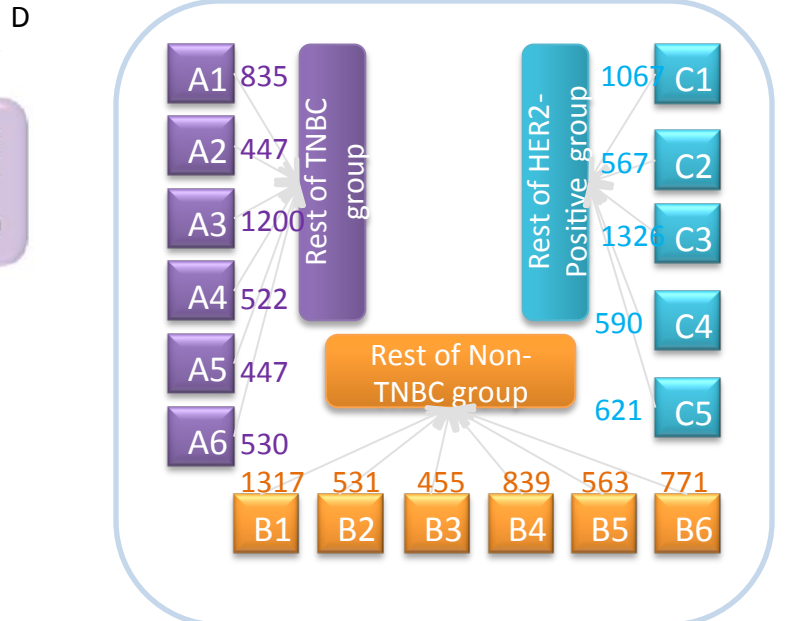

Supplement Figure 12 : Log2 ratio of intensity plot showing up and down regulated transcripts from differential expression analysis (supplement methods)

TNBC vs Non-TNBC

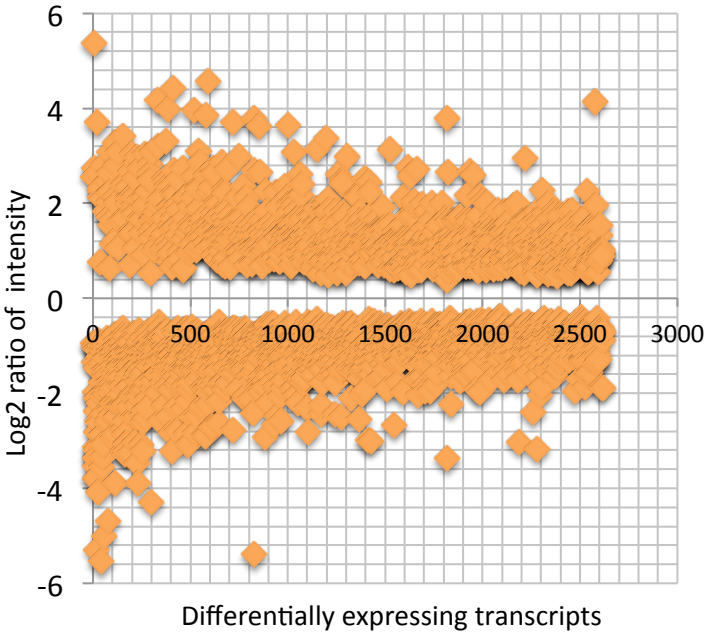

|                          |      |
|--------------------------|------|
| Up regulated in TNBC     | 962  |
| Up regulated in Non-TNBC | 1655 |

TNBC vs HER2-Positive

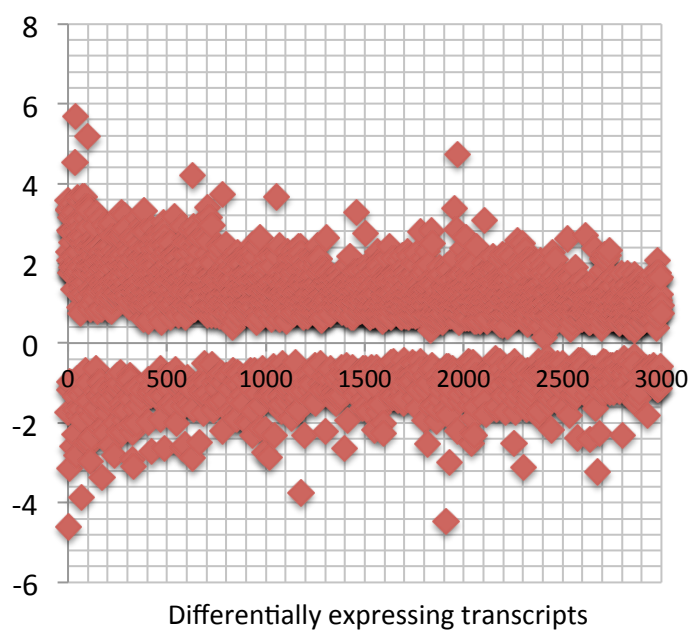

|                               |      |
|-------------------------------|------|
| Up regulated in TNBC          | 2416 |
| Up regulated in HER2-Positive | 673  |

Non- TNBC vs HER2-Positive

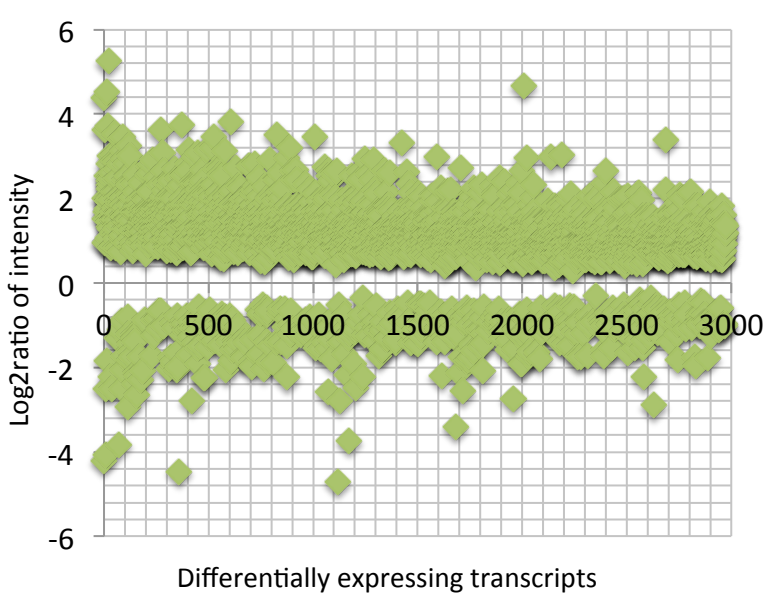

|                               |      |
|-------------------------------|------|
| Up regulated in Non-TNBC      | 2509 |
| Up regulated in HER2-Positive | 463  |

Supplement Figure 13: Volcano plot showing differentially expressing statistically significant genes (A, B and C) assembled based on genome Ensembl GRCh37.62 from F-test of TNBC vs Non-TNBC, Non-TNBC vs HER2 Positive and TNBC vs HER2-Positive genes and transcripts

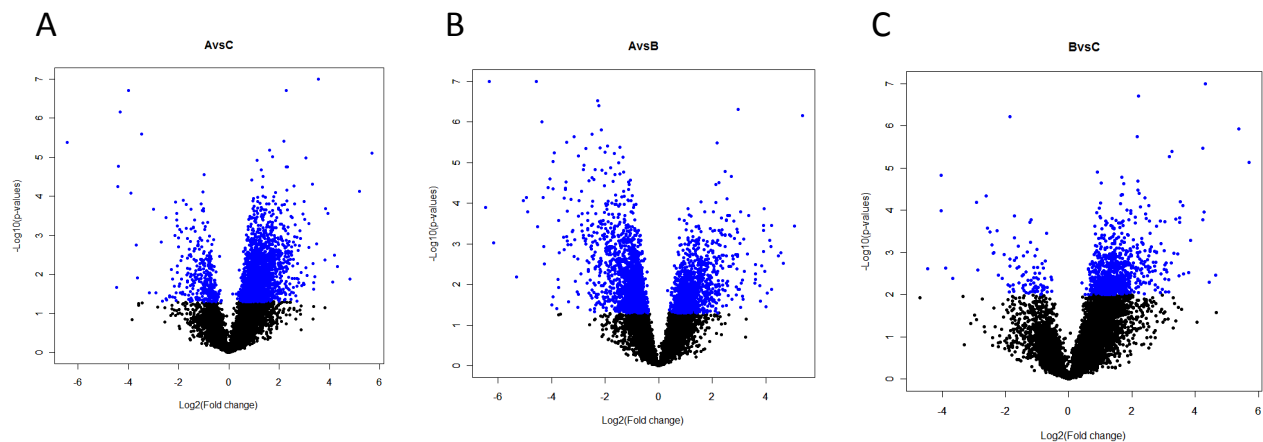

Supplement Figure 14: Volcano plot showing differentially expressing statistically significant transcripts (A, B and C) (assembled based on UCSC HG19 genome) from F-test of TNBC vs Non-TNBC, Non-TNBC vs HER2 Positive and TNBC vs HER2-Positive genes and transcripts

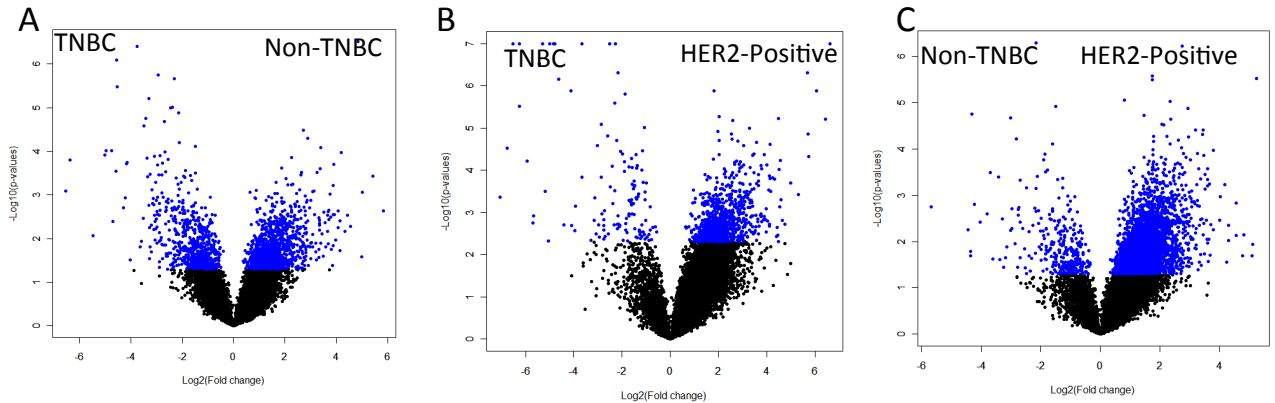

Supplement Figure 15: Venn Diagram showing differentially expressing statistically significant transcripts (A) genes (B) assembled based on genome Ensembl GRCh37.62 from F-test of TNBCvs Non-TNBC (AvsB), Non-TNBC vs HER2 Positive (BvsC) and TNBC vs HER2-Positive genes and transcripts

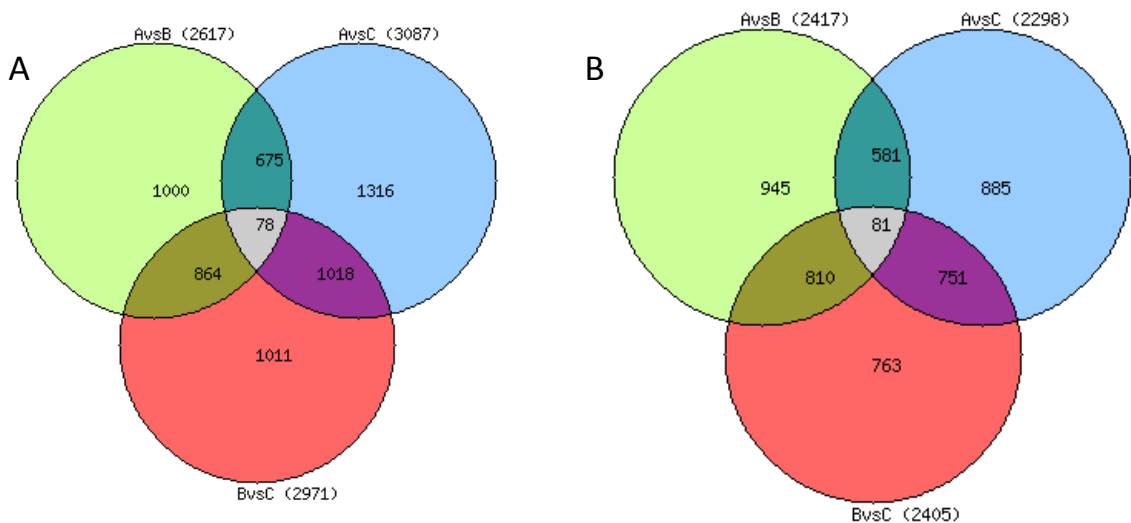

Supplement Figure 16 : GOAnalysis of TNBC vs Non-TNBC differentially expressing transcripts assembled using Ensembl GRCh37.62 as a reference (A)cellular, (B) biological and (C) molecular functions

A

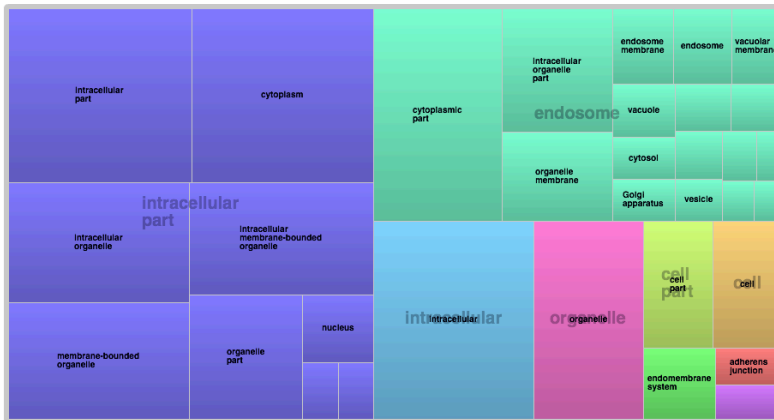

B

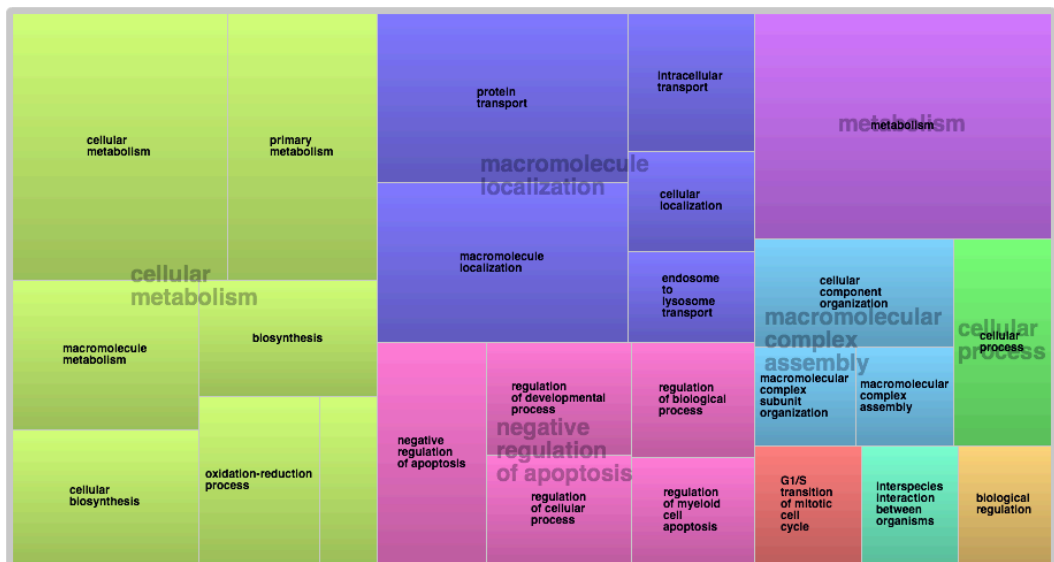

C

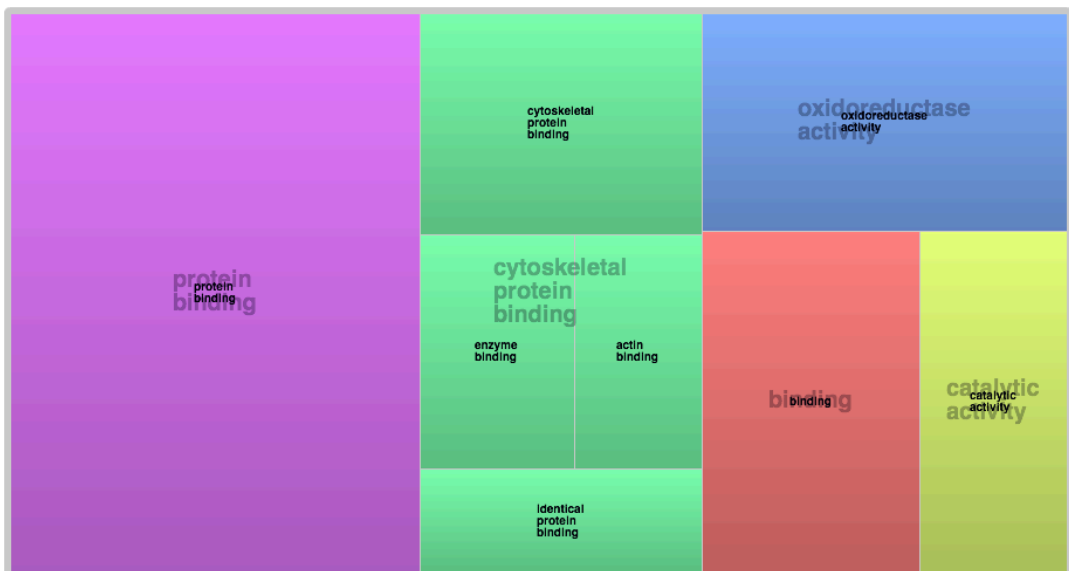

Supplement Figure 17 : GO Analysis of TNBC vs HER2-Positive differentially expressing transcripts assembled using Ensembl GRCh37.62 as a reference (A)cellular, (B) biological and (C) molecular functions

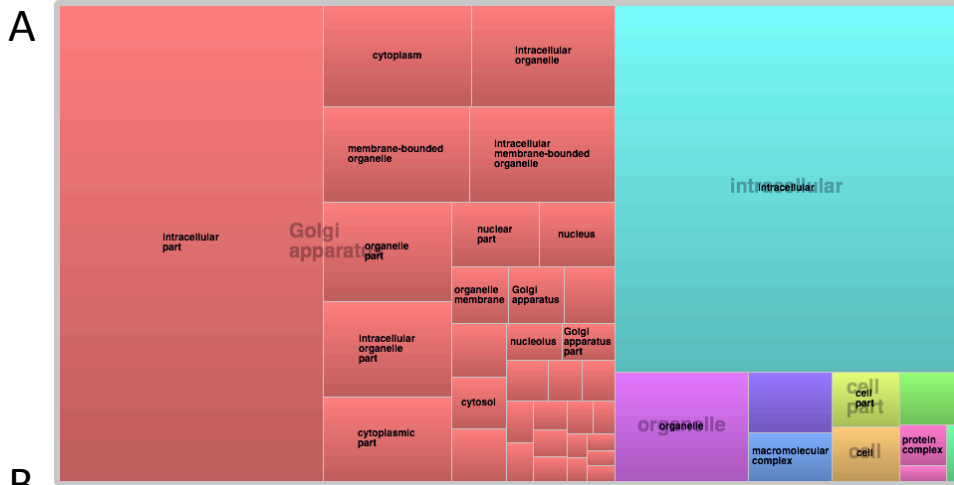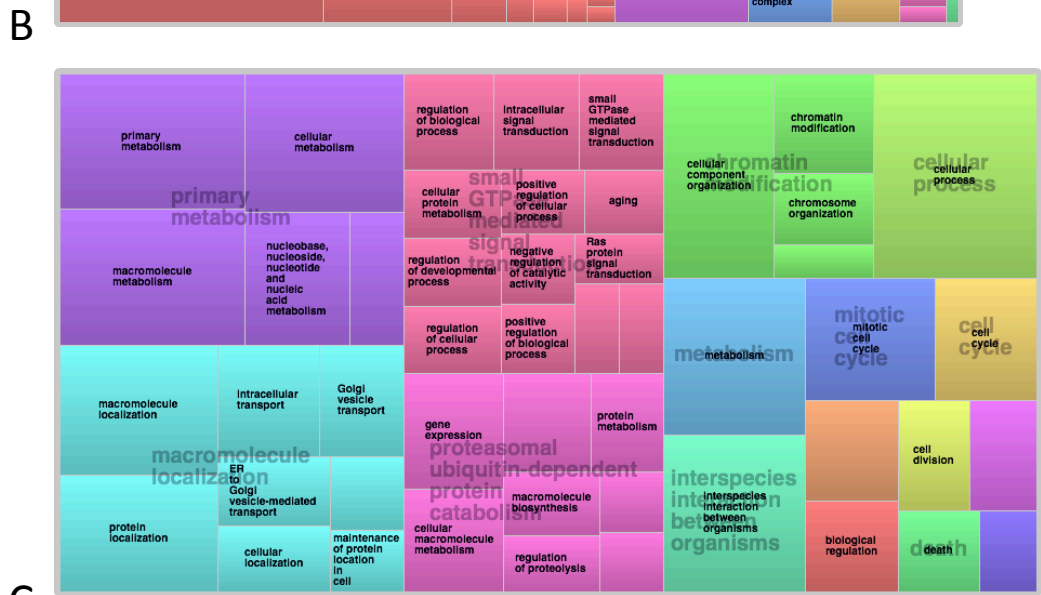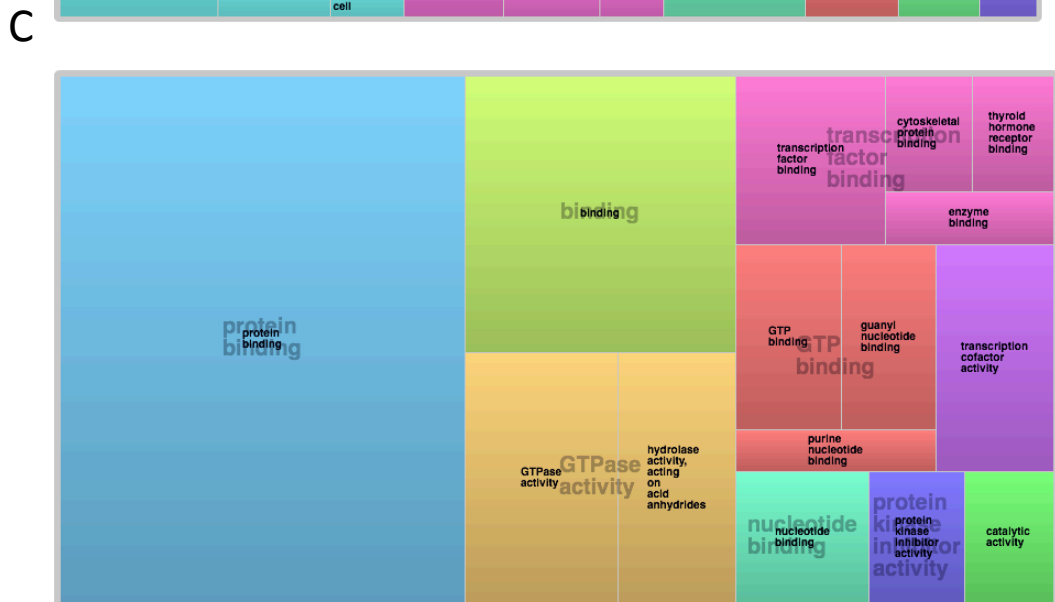

Supplement Figure 18: GO Analysis of Non-TNBC vs HER2-Positive differentially expressing transcripts assembled using Ensembl GRCh37.62 as a reference (A) cellular, (B) biological and (C) molecular functions

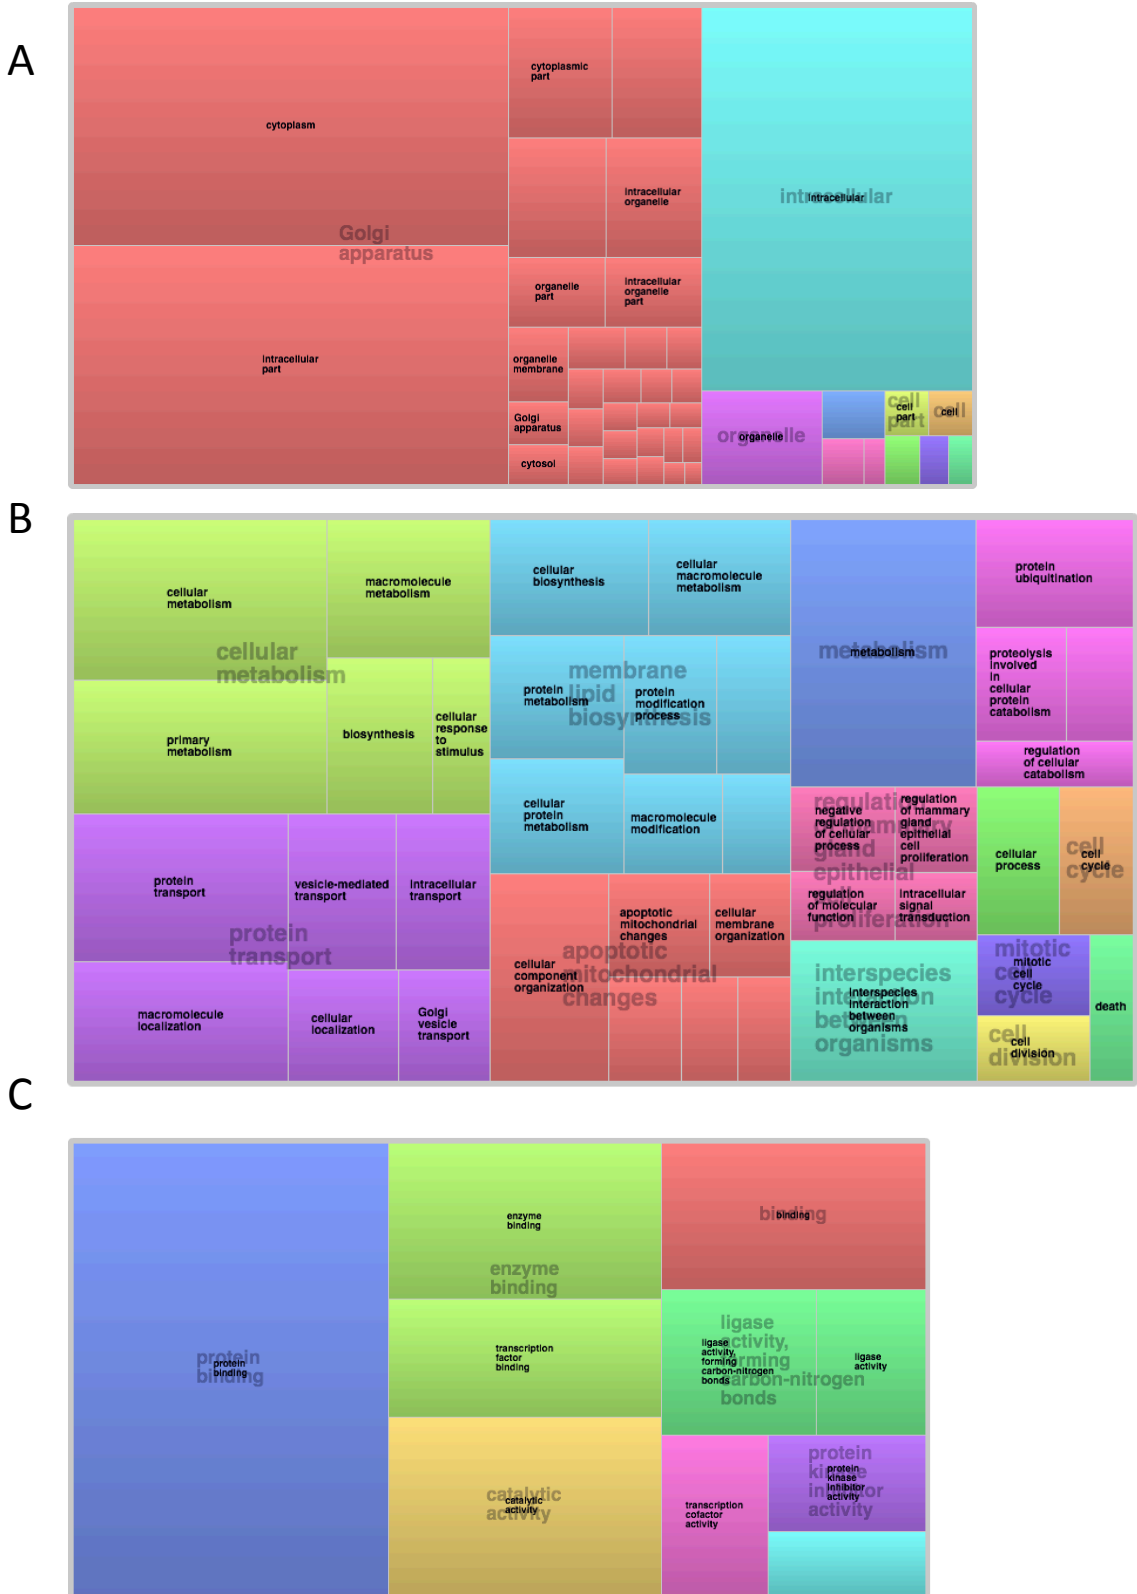

Supplement Figure 19 : IPA Analysis showing (A) canonical (B) functional and (C) signaling network influenced by TNBC vs Non-TNBC differentially expressing Transcripts

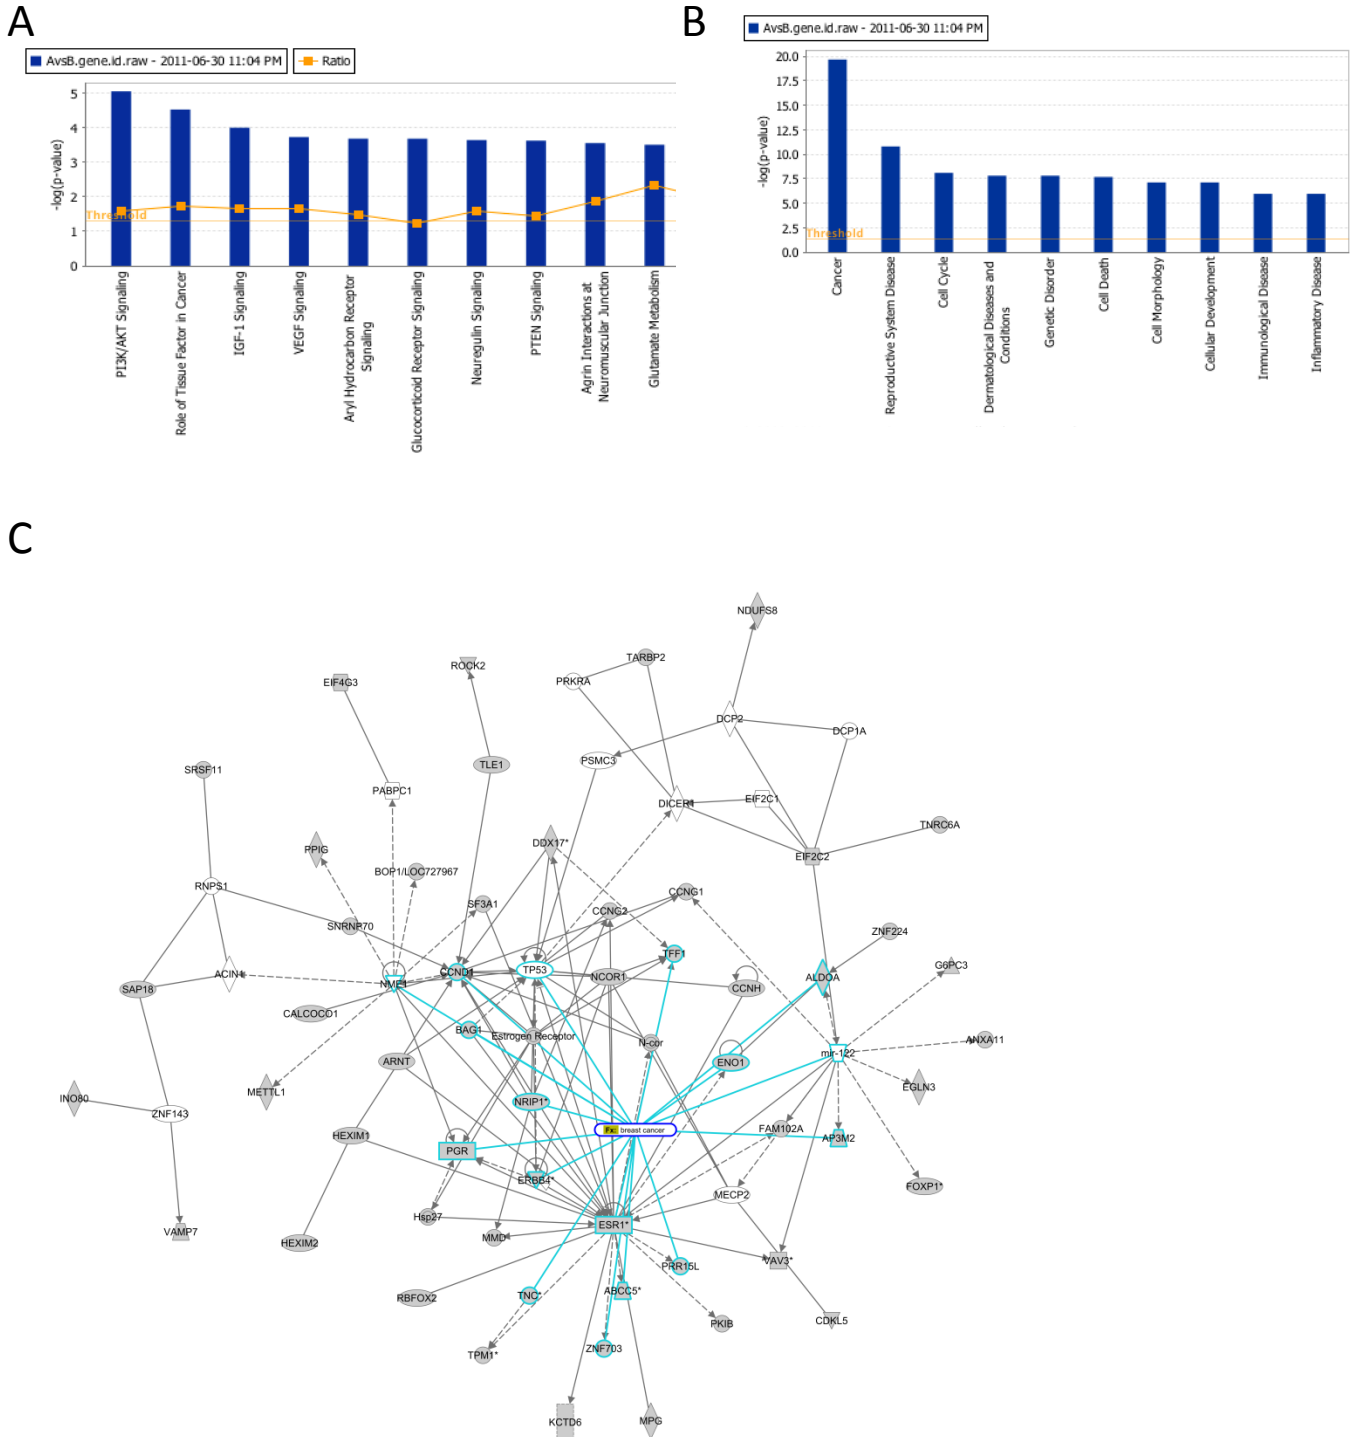



Supplement Figure 20 : IPA Analysis showing (A) canonical (B) functional and (C) signaling network influenced by TNBC vs HER2-Positive differentially expressing Transcripts assembled using Ensembl

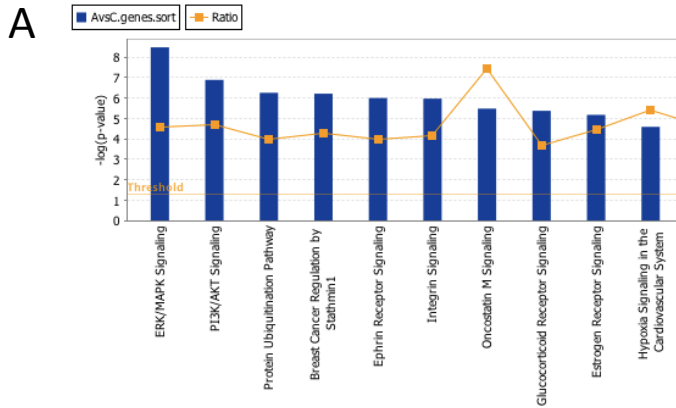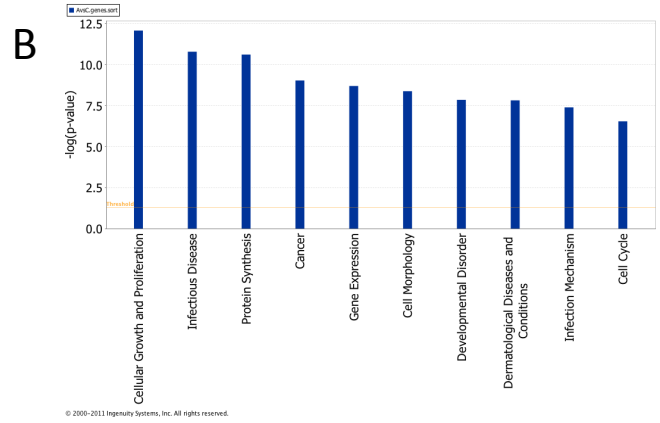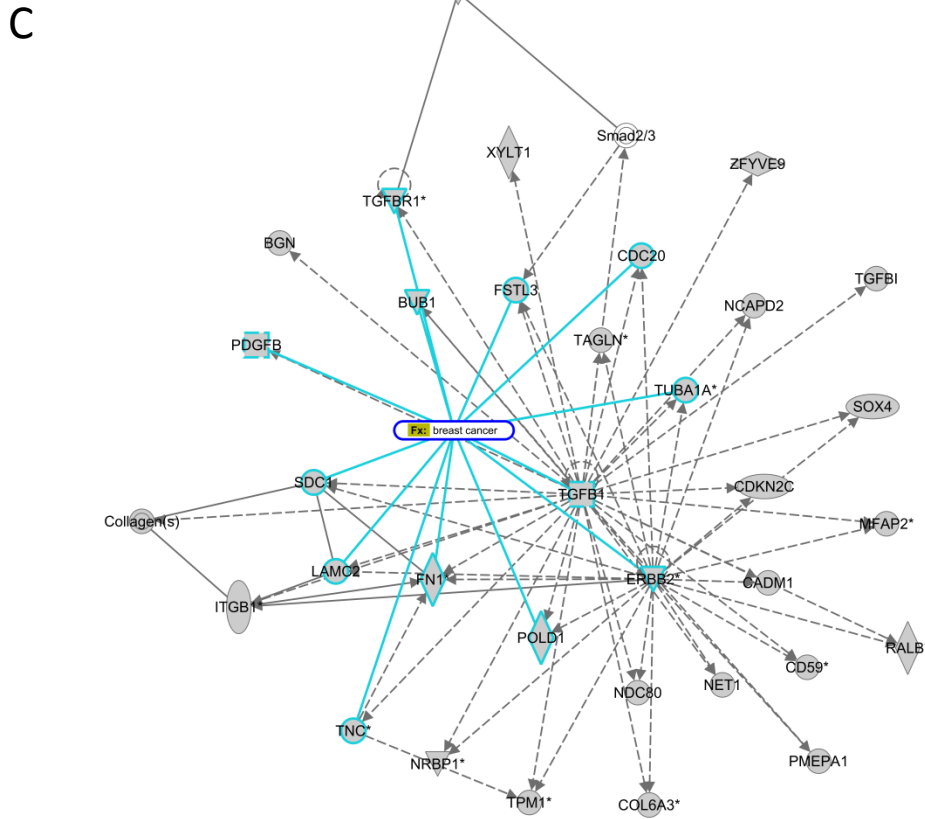

Supplement Figure 21: IPA Analysis showing (A) canonical (B) functional and (C) signaling network influenced by Non-TNBC vs HER2-Positive differentially expressing transcripts

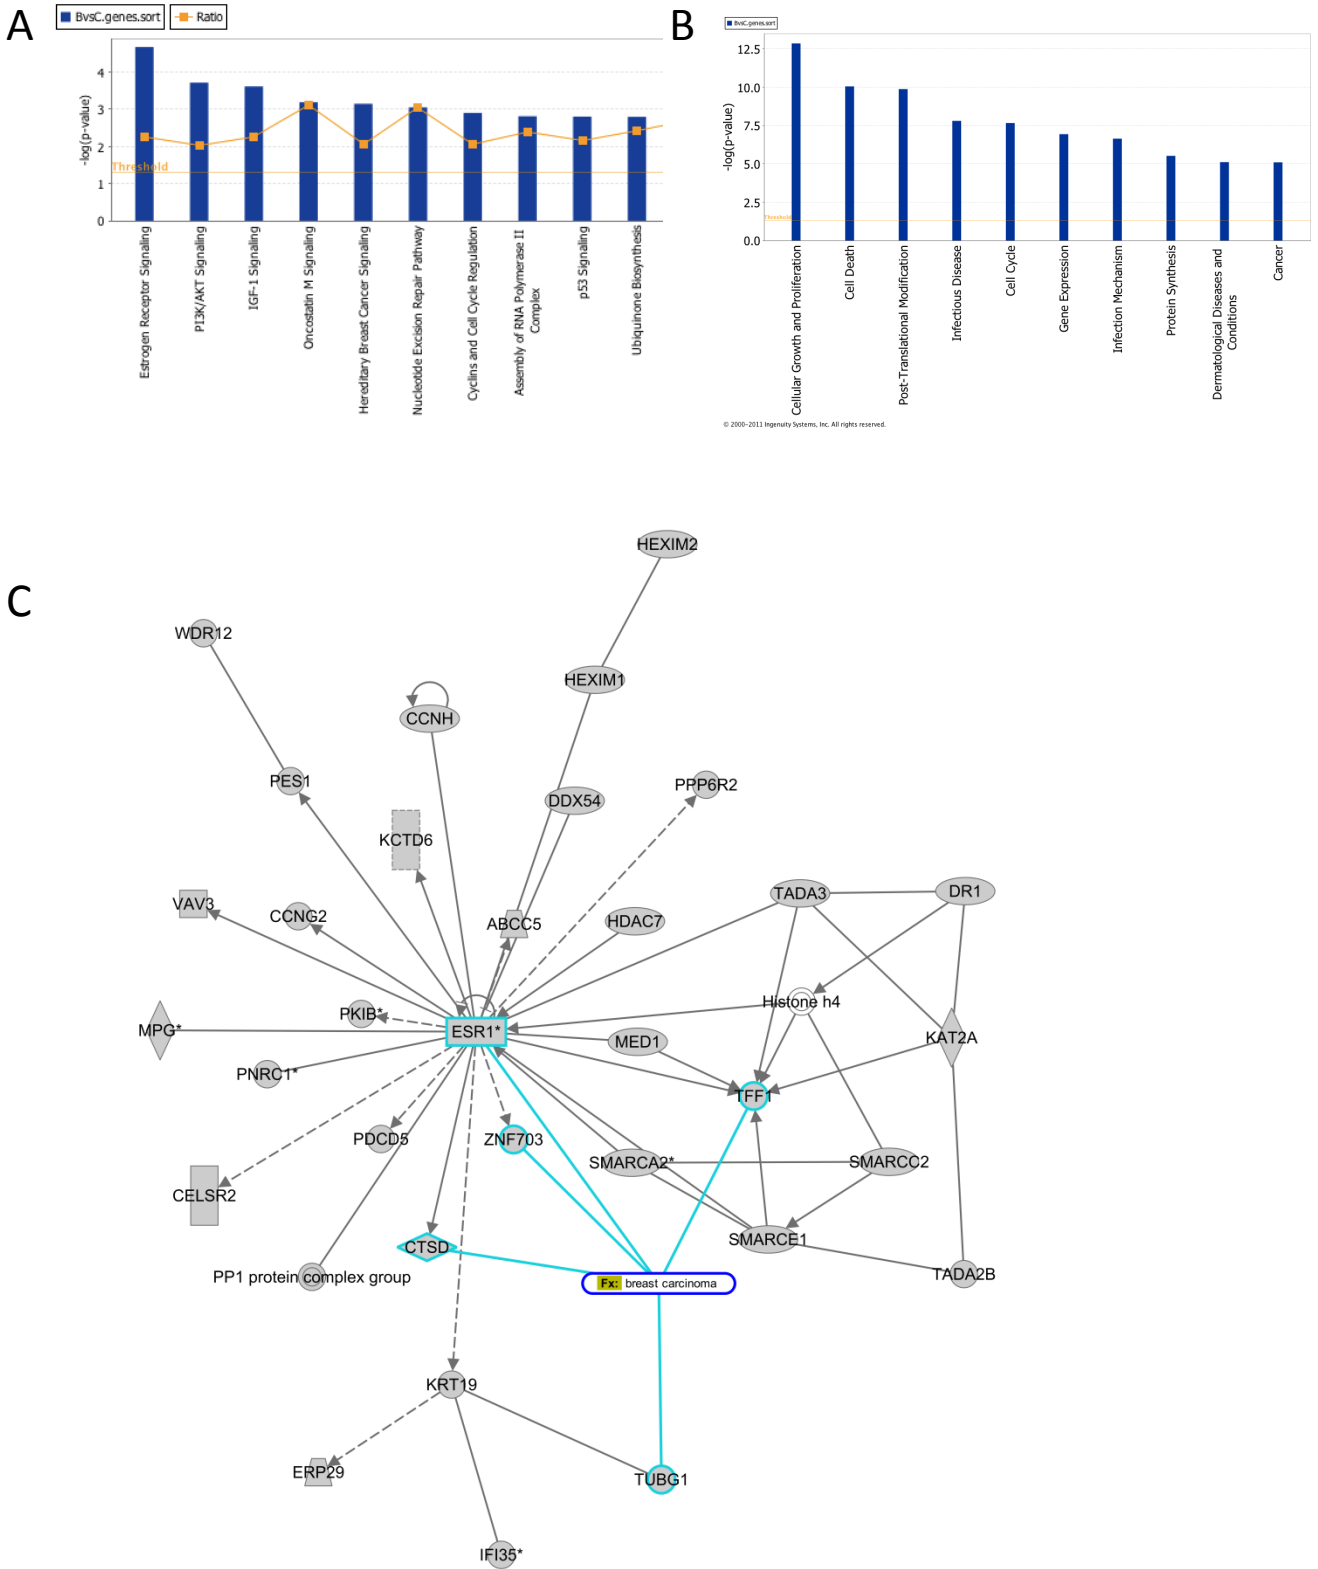

Supplement Figure 22: The schematic showing the strategy of microarray analysis and how the genes identified from analyses microarray are compared against the mRNA sequencing pair-wise comparisons

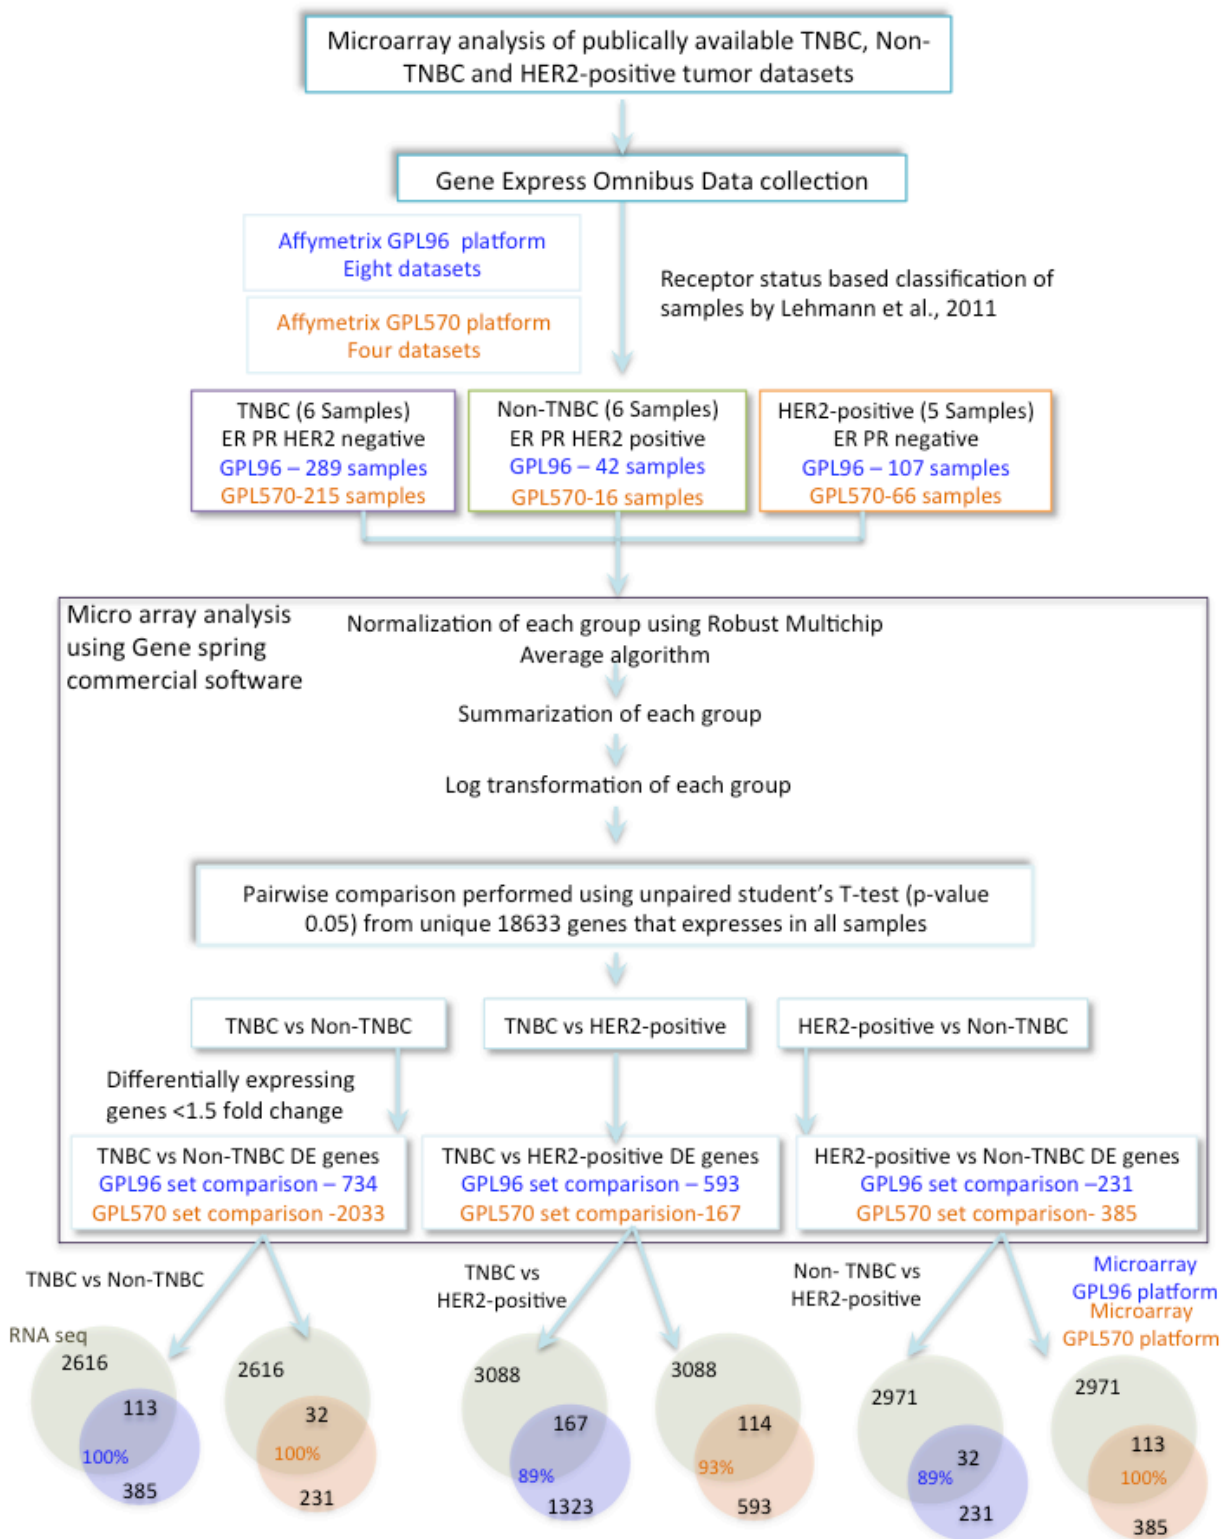

Agreement between mRNAseq and Microarray overlapping gene expression trend in GPL96 dataset

Agreement between mRNAseq and Microarray overlapping gene expression trend in GPL570 dataset
